# Supplementary material
Source: PubMed Central journal article supplement (PMC3104910)
Supplement: supp_86.6.509_ChenSupportingOnlineMaterial.pdf [file supp_86.6.509_ChenSupportingOnlineMaterial.pdf]

## Supporting Online Material

Chen WT, White CM, Phung OJ, Kluger J, Ashaye AO, Sobieraj DM, Makanji S, Tongbram V, Baker WL, Coleman CI. Association Between CHADS<sub>2</sub> Risk Factors and Anticoagulation-Related Bleeding: A Systematic Literature Review. *Mayo Clin Proc.* 2011;86(6):509-521

**TABLE S1.** Definitions for Grading the Strength of Evidence

**TABLE S2.** Evidence Depicting the Association Between Chronic Heart Failure and Warfarin-Associated Bleeding Risk

**TABLE S3.** Evidence Depicting the Association Between Hypertension and Warfarin-Associated Bleeding Risk

**TABLE S4.** Evidence Depicting the Association Between Age and Warfarin-Associated Bleeding Risk

**TABLE S5.** Evidence Depicting the Association Between Diabetes and Warfarin-Associated Bleeding Risk

**TABLE S6.** Evidence Depicting the Association Between Prior Stroke/TIA (CVD) and Warfarin-Associated Bleeding Risk

**TABLE S7.** Evidence Depicting the Association Between CHADS<sub>2</sub> Score and Warfarin-Associated Bleeding Risk

This supplementary material has been peer reviewed and the authors confirm that data are accurate.

## Supporting Online Material

TABLE S1. Definitions for Grading the Strength of Evidence

| Grade        | Definition                                                                                                                                                                    |
|--------------|-------------------------------------------------------------------------------------------------------------------------------------------------------------------------------|
| High         | There is high confidence that the evidence reflects the true effect. Further research is very unlikely to change our confidence in the estimate of effect                     |
| Moderate     | Moderate confidence that the evidence reflects the true effect. Further research may change our confidence in the estimate of effect and may change the estimate              |
| Low          | Low confidence that the evidence reflects the true effect. Further research is likely to change our confidence in the estimate of effect and is likely to change the estimate |
| Very low     | Very low confidence that the evidence reflects the true effect. Any estimate of effect is very uncertain                                                                      |
| Insufficient | Evidence either is unavailable or does not permit estimation of an effect                                                                                                     |

**TABLE S2. Evidence Depicting the Association Between Chronic Heart Failure and Warfarin-Associated Bleeding Risk<sup>a</sup>**

| Reference                                                       | Study design | Covariate                               | Bleeding definition                                                                                                                                                                                                                                                                       | No. of cases/events (rate/100 PTY) | Univariate <i>P</i> value | Multivariate “X”R (95% CI) | Multivariate <i>P</i> value | Effect (↑ ↔ ↓) <sup>b</sup> | Quality <sup>c</sup> |
|-----------------------------------------------------------------|--------------|-----------------------------------------|-------------------------------------------------------------------------------------------------------------------------------------------------------------------------------------------------------------------------------------------------------------------------------------------|------------------------------------|---------------------------|----------------------------|-----------------------------|-----------------------------|----------------------|
| <b><i>Major bleeding event</i></b>                              |              |                                         |                                                                                                                                                                                                                                                                                           |                                    |                           |                            |                             |                             |                      |
| Manzano-Fernández et al, <sup>21</sup> 2009 (N=166)             | R, O         | Previous heart failure (n=58)           | A major bleeding event was defined as fatal decrease in blood Hgb level >4 g/dL (>40 g/L), need for transfusion of ≥2 units (≥900 mL) of blood, need for corrective surgery intervention, the occurrence of intracranial or retroperitoneal bleeding, or any combinations of these events | 26 (10.8)                          | .442                      | NA                         | NA                          | NA                          | Fair                 |
| Abdelhafiz & Wheeldon, <sup>15</sup> 2008a (N=199) <sup>d</sup> | P, O         | History of chronic heart failure (n=37) | Bleeding requiring hospital admission, emergency procedure, and/or blood transfusion                                                                                                                                                                                                      | 6 (NR)                             | .90                       | AOR, 2.5 (0.08-78.9)       | .60                         | ↔                           | Fair                 |
| Abdelhafiz & Wheeldon, <sup>15</sup> 2008b (N=203) <sup>e</sup> | P, O         | History of chronic heart failure (n=44) | Bleeding requiring hospital admission, emergency procedure, and/or blood transfusion                                                                                                                                                                                                      | 5 (NR)                             | .07                       | AOR, 1.1 (0.03-34)         | .90                         | ↔                           | Fair                 |

|                                                |      |                                                                                                                              |                                                                                                                                                                                                            |                        |      |                       |      |                   |      |
|------------------------------------------------|------|------------------------------------------------------------------------------------------------------------------------------|------------------------------------------------------------------------------------------------------------------------------------------------------------------------------------------------------------|------------------------|------|-----------------------|------|-------------------|------|
| Poli et al, <sup>23</sup><br>2007<br>(N=290)   | P, O | LVSD defined as a recent diagnosis of heart failure or a fractional shortening <25% by transthoracic echocardiography (n=71) | Fatal, intracranial (documented by imaging), ocular causing blindness, articular, or retroperitoneal, when surgery or transfusion of >2 blood units were required or when Hgb was reduced by $\geq 2$ g/dL | 17 (2.1)               | NS   | NA                    | NA   | NA                | Fair |
| Gasse et al, <sup>18</sup><br>2005<br>(N=188)  | R, O | Heart failure (n=85)                                                                                                         | Bleeding events resulting in hospitalization or fatality                                                                                                                                                   | 45 (NR)                | 0.05 | AOR, 1.5 (0.7-3.2)    | NS   | $\leftrightarrow$ | Fair |
| Schauer et al, <sup>25</sup> 005a<br>(N=9345)  | R, O | Chronic heart failure (n=7140)                                                                                               | Inpatient hospitalization for ICH using <i>ICD-9-CM</i> codes                                                                                                                                              | 158 <sup>f</sup> (0.8) | NS   | NA                    | NA   | NA                | Fair |
| Schauer et al, <sup>25</sup> 2005b<br>(N=9345) | R, O | Chronic heart failure (n=7140)                                                                                               | GI bleeding requiring hospitalization using <i>ICD-9-CM</i> codes                                                                                                                                          | 864 <sup>f</sup> (4.6) | <.05 | AHR, 1.31 (1.09-1.58) | <.05 | $\uparrow$        | Fair |
| Fang et al, <sup>17</sup><br>2004<br>(N=1190)  | R, O | Heart failure (n=413)                                                                                                        | ICH documented by computed tomography or magnetic resonance imaging                                                                                                                                        | 170 (NR)               | .08  | NA                    | NA   | NA                | Poor |

|                                                           |      |                                  |                                                                                                                                                                                                                                                               |                       |     |                                       |    |                   |      |
|-----------------------------------------------------------|------|----------------------------------|---------------------------------------------------------------------------------------------------------------------------------------------------------------------------------------------------------------------------------------------------------------|-----------------------|-----|---------------------------------------|----|-------------------|------|
| Sam et al, <sup>24</sup><br>2004<br>(N=80)                | R, O | Chronic heart failure<br>(n=19)  | Bleeding resulting<br>in death,<br>hospitalization, or a<br>decrease in Hgb $\geq$ 2<br>g/dL or requiring<br>$\geq$ 2 units of RBC<br>transfusion                                                                                                             | 16 (NR)               | NS  | NA                                    | NA | NA                | Poor |
| Berwaerts &<br>Webster, <sup>16</sup><br>2000a<br>(N=272) | R, O | Heart failure<br>(n=101)         | ICH                                                                                                                                                                                                                                                           | 68 (NR)               | NS  | AOR, 1.02<br>(0.41-2.56) <sup>g</sup> | NS | $\leftrightarrow$ | Fair |
| Berwaerts &<br>Webster, <sup>16</sup><br>2000b<br>(N=168) | R, O | Heart failure<br>(n=67)          | Intracerebral<br>hemorrhage                                                                                                                                                                                                                                   | 42 (NR)               | NS  | AOR, 0.72<br>(0.20–2.59) <sup>g</sup> | NS | $\leftrightarrow$ | Fair |
| SPAF, 1996<br>(N=555)                                     | RCT  | Chronic heart failure<br>(n=117) | A bleeding event<br>was called major<br>when it involved the<br>central nervous<br>system; required<br>hospitalization,<br>blood transfusion,<br>and/or surgical<br>intervention; or<br>resulted in<br>permanent<br>functional<br>impairment to any<br>degree | 33 <sup>f</sup> (2.3) | .05 | NA                                    | NA | NA                | Poor |
| Hylek &<br>Singer, <sup>19</sup><br>1994a<br>(N=308)      | R, O | Chronic heart failure<br>(n=54)  | Intracerebral<br>hemorrhage                                                                                                                                                                                                                                   | 77 (NR)               | NS  | NA                                    | NA | NA                | Poor |

|                                                                    |      |                                 |                                                                                                                                                                                                                                                                                                                                                                                                                                                                                                                                                                                                                                                                                               |         |    |    |    |    |      |
|--------------------------------------------------------------------|------|---------------------------------|-----------------------------------------------------------------------------------------------------------------------------------------------------------------------------------------------------------------------------------------------------------------------------------------------------------------------------------------------------------------------------------------------------------------------------------------------------------------------------------------------------------------------------------------------------------------------------------------------------------------------------------------------------------------------------------------------|---------|----|----|----|----|------|
| Hylek & Singer, <sup>19</sup><br>1994<br>(N=176)                   | R, O | Chronic heart failure<br>(n=40) | Subdural<br>hemorrhage                                                                                                                                                                                                                                                                                                                                                                                                                                                                                                                                                                                                                                                                        | 44 (NR) | NS | NA | NA | NA | Poor |
| Landefeld & Foldman, <sup>20</sup><br>1989<br>(N=375) <sup>h</sup> | R, O | Heart failure<br>(n=NR)         | Bleeding in<br>outpatients that (1)<br>was fatal, (2) was<br>life-threatening (led<br>to cardiopulmonary<br>arrest, surgical or<br>angiographic<br>intervention to stop<br>the blood loss, or<br>irreversible<br>damage, such as<br>MI, stroke,<br>blindness, or<br>fibrothorax), (3)<br>was potentially life-<br>threatening (led to<br>2 of 3<br>consequences:<br>severe blood loss,<br>hypotension (SBP<br><90 mm Hg), and<br>critical anemia with<br>a hematocrit $\leq 0.2$ ),<br>(4) led to severe<br>blood loss ( $\geq 3$ units<br>of blood), (5) led to<br>surgical treatment,<br>or (6) led to<br>moderate blood loss<br>that was acute or<br>subacute, and was<br>not explained by | NR (NR) | NS | NA | NA | NA | Poor |

---

trauma or surgery

---

|                                                                          |      |                                               |                                                                                                                                               |          |      |                         |     |   |      |
|--------------------------------------------------------------------------|------|-----------------------------------------------|-----------------------------------------------------------------------------------------------------------------------------------------------|----------|------|-------------------------|-----|---|------|
| Petitti et al, <sup>22</sup><br>1989<br>(N=2029)                         | R, O | Treated heart failure<br>(n=107)              | Bleeding resulting<br>in death or<br>hospitalization                                                                                          | 134 (NR) | <.05 | AHR, 1.4 (0.9-<br>2.0)  | NS  | ↔ | Poor |
| <b>Minor<br/>bleeding<br/>event</b>                                      |      |                                               |                                                                                                                                               |          |      |                         |     |   |      |
| Abdelhafiz &<br>Wheeldon, <sup>15</sup><br>2008a<br>(N=199) <sup>d</sup> | P, O | History of chronic<br>heart failure<br>(n=37) | Bleeding not<br>requiring hospital<br>admission,<br>emergency<br>procedure, blood<br>transfusion, or with<br>no other medical<br>consequences | 47 (NR)  | .90  | AOR, 1.3<br>(0.40-4.0)  | .70 | ↔ | Fair |
| Abdelhafiz &<br>Wheeldon, <sup>15</sup><br>2008b<br>(N=203) <sup>e</sup> | P, O | History of chronic<br>heart failure<br>(n=44) | Bleeding not<br>requiring hospital<br>admission,<br>emergency<br>procedure, blood<br>transfusion, or with<br>no other medical<br>consequences | 42 (NR)  | .60  | AOR, 0.44<br>(0.16-1.2) | .10 | ↔ | Fair |

---

|                                                                          |      |                                               |                                                                                                                                                                                                                                                                                                                        |          |     |                        |      |   |      |
|--------------------------------------------------------------------------|------|-----------------------------------------------|------------------------------------------------------------------------------------------------------------------------------------------------------------------------------------------------------------------------------------------------------------------------------------------------------------------------|----------|-----|------------------------|------|---|------|
| Petitti et al, <sup>22</sup><br>1989<br>(N=2029)                         | R, O | Treated heart failure<br>(n=107)              | Bleeding not<br>resulting in death or<br>hospitalization                                                                                                                                                                                                                                                               | 481 (NR) | NS  | AHR, 0.6 (0.3-<br>0.9) | <.05 | ↓ | Fair |
| <b><i>Any bleeding event</i></b>                                         |      |                                               |                                                                                                                                                                                                                                                                                                                        |          |     |                        |      |   |      |
| Abdelhafiz &<br>Wheeldon, <sup>15</sup><br>2008a<br>(N=199) <sup>d</sup> | P, O | History of chronic<br>heart failure<br>(n=37) | Combination of<br>major and minor<br>bleeding events<br>where a major<br>bleeding event was<br>defined as bleeding<br>requiring hospital<br>admission,<br>emergency<br>procedure, and/or<br>blood transfusion; a<br>minor bleeding<br>event was defined<br>as all other<br>bleeding with no<br>medical<br>consequences | 53 (NR)  | .80 | AOR, 1.1<br>(0.37-3.5) | .80  | ↔ | Good |



|                                                                 |      |                                         |                                                                                                                                                                                                                                                                        |          |     |                      |     |   |      |
|-----------------------------------------------------------------|------|-----------------------------------------|------------------------------------------------------------------------------------------------------------------------------------------------------------------------------------------------------------------------------------------------------------------------|----------|-----|----------------------|-----|---|------|
| Abdelhafiz & Wheeldon, <sup>15</sup> 2008b (N=203) <sup>e</sup> | P, O | History of chronic heart failure (n=44) | Combination of major and minor bleeding events where a major bleeding event was defined as bleeding requiring hospital admission, emergency procedure, and/or blood transfusion; a minor bleeding event was defined as all other bleeding with no medical consequences | 47 (NR)  | .90 | AOR, 0.61 (0.24-1.6) | .30 | ↔ | Fair |
| Wandell, <sup>26</sup> 2001 (N=957)                             | R, O | Heart failure (n=NR)                    | Combination of major and minor bleeding events where a major bleeding event was defined as bleeding requiring hospitalization; a minor bleeding event was defined as bleeding reported by patients and not requiring hospitalization                                   | 44 (6.2) | .01 | NR                   | NS  | ↔ | Poor |

<sup>a</sup> AHR = adjusted hazard ratio; AOR = adjusted odds ratio; CI = confidence interval; GI = gastrointestinal; Hgb = hemoglobin; *ICD-9-CM* = *International Classification of Diseases, Ninth Revision, Clinical Modification*; ICH = intracranial hemorrhage; LVSD = left ventricular systolic dysfunction; MI = myocardial infarction; NA = not available; NR = not reported; NS = not significant; O = observational study; P = prospective; PTY = patient-years; R = retrospective; RBC = red blood cell; RCT = randomized controlled trial; SBP = systolic blood pressure; SPAF = Stroke

Prevention in Atrial Fibrillation; “X”R = effect size.

<sup>b</sup>↑=statistically significant increased effect; ↓=statistically significant decreased effect; ↔=no statistically significant effect.

<sup>c</sup> Quality rated as good, fair, or poor based on study design (prospective vs retrospective), likelihood of type 2 error (underpowered analysis due to insufficient patient-years of follow-up, small number of events, or too homogeneous a population), reliability of bleeding definition (use of a well-defined and accepted definition).

<sup>d</sup> All patients in the group aged  $\geq 75$  y.

<sup>e</sup> All patients in the group aged  $< 75$  y.

<sup>f</sup> Number of bleeding events reported.

<sup>g</sup> Multivariate regression based on 50 cases of ICH and 200 controls because of incomplete data; 31 cases of intracerebral hemorrhage and 122 controls because of incomplete data.

<sup>h</sup> Derivation cohort drawn from 565 patients beginning long-term outpatient warfarin therapy.

**Table S3. Evidence Depicting the Association Between Hypertension and Warfarin-Associated Bleeding Risk<sup>a</sup>**

| Reference                               | Study design | Covariate           | Bleeding definition                                                                                                                                                                                                                          | No. of cases/ events (Rate/100 PTY) | Univariate <i>P</i> value | Multivariate “X”R (95% CI) | Multivariate <i>P</i> value | Effect (↑↔↓) <sup>b</sup> | Quality <sup>c</sup> |
|-----------------------------------------|--------------|---------------------|----------------------------------------------------------------------------------------------------------------------------------------------------------------------------------------------------------------------------------------------|-------------------------------------|---------------------------|----------------------------|-----------------------------|---------------------------|----------------------|
| <i>Major bleeding event</i>             |              |                     |                                                                                                                                                                                                                                              |                                     |                           |                            |                             |                           |                      |
| Lind et al, <sup>31</sup> 2009a (N=356) | P, O         | Hypertension (n=NR) | Major bleeding events were defined as fatal bleeding and/or symptomatic bleeding in a critical area or organ and/or bleeding causing a fall in Hgb level of ≥2 g/dL (≥20 g/L) or leading to transfusion of ≥2 units (≥900 mL) of whole blood | NR                                  | NS                        | NA                         | NA                          | NA                        | Poor                 |

---

|                                               |      |                        |                                                                                                                                                                                                                                                                                                             |    |    |    |    |    |      |
|-----------------------------------------------|------|------------------------|-------------------------------------------------------------------------------------------------------------------------------------------------------------------------------------------------------------------------------------------------------------------------------------------------------------|----|----|----|----|----|------|
| Lind et al, <sup>31</sup><br>2009b<br>(N=356) | P, O | Hypertension<br>(n=NR) | Clinically<br>relevant<br>bleeding was<br>defined as a<br>major bleeding<br>event or an<br>overt bleeding<br>event based on<br>objective<br>investigations<br>that caused<br>admission to<br>hospital or<br>prolonged<br>hospital care<br>but did not<br>meet the criteria<br>for a major<br>bleeding event | NR | NS | NA | NA | NA | Poor |
|-----------------------------------------------|------|------------------------|-------------------------------------------------------------------------------------------------------------------------------------------------------------------------------------------------------------------------------------------------------------------------------------------------------------|----|----|----|----|----|------|

---

|                                                                 |      |                                |                                                                                                                                                                                                                                                                                 |           |      |                      |     |    |      |
|-----------------------------------------------------------------|------|--------------------------------|---------------------------------------------------------------------------------------------------------------------------------------------------------------------------------------------------------------------------------------------------------------------------------|-----------|------|----------------------|-----|----|------|
| Manzano-Fernández et al, <sup>21</sup> 2009 (N=166)             | R, O | Hypertension (n=108)           | A major bleeding event was defined as fatal, decrease in blood Hgb level >4 g/dL (40 g/L), need for transfusion of ≥2 units of blood, need for corrective surgery intervention, the occurrence of intracranial or retroperitoneal bleeding, or any combinations of these events | 26 (10.8) | .198 | NA                   | NA  | NA | Fair |
| Abdelhafiz & Wheeldon, <sup>15</sup> 2008a (N=199) <sup>d</sup> | P, O | History of hypertension (n=58) | Bleeding requiring hospital admission, emergency procedure, and/or blood transfusion                                                                                                                                                                                            | 6 (NR)    | .30  | AOR, 4.5 (0.25-80.9) | .30 | ↔  | Fair |
| Abdelhafiz & Wheeldon, <sup>15</sup> 2008b (N=203) <sup>e</sup> | P, O | History of hypertension (n=55) | Bleeding requiring hospital admission, emergency procedure, and/or blood transfusion                                                                                                                                                                                            | 5 (NR)    | .70  | AOR, 0.51 (0.01-25)  | .70 | ↔  | Fair |

|                                                            |      |                                                                                                                 |                                                                                                                                                                                                                             |          |      |                       |    |    |      |
|------------------------------------------------------------|------|-----------------------------------------------------------------------------------------------------------------|-----------------------------------------------------------------------------------------------------------------------------------------------------------------------------------------------------------------------------|----------|------|-----------------------|----|----|------|
| Poli et al, <sup>23</sup><br>2007<br>(N=290)               | P, O | Hypertension defined as the presence of blood pressure >160 mm Hg and/or an anti-hypertensive treatment (n=177) | Fatal, intracranial (documented by imaging), ocular causing blindness, articular, or retroperitoneal, when surgery or transfusion of >2 blood units were required or when Hgb was reduced by $\geq 2$ g/dL ( $\geq 20$ g/L) | 17 (2.1) | NS   | NA                    | NA | NA | Fair |
| Suzuki et al, <sup>34</sup><br>2007<br>(N=667)             | R, O | Hypertension (n=527)                                                                                            | Bleeding requiring emergent hospitalization and ICHs                                                                                                                                                                        | 12 (2.4) | 0.71 | AOR, 1.32 (0.27-6.33) | NS | ↔  | Poor |
| Wallvik et al, <sup>35</sup> 2007<br>(N=1579) <sup>f</sup> | P, O | Hypertension (n=523)                                                                                            | Bleeding event causing admission or prolonged in-hospital care and all fatal bleeding events                                                                                                                                | 114 (NR) | NA   | AOR, 1.06 (0.72-1.56) | NS | ↔  | Good |

|                                                   |      |                          |                                                                                                                              |                         |     |                          |      |    |      |
|---------------------------------------------------|------|--------------------------|------------------------------------------------------------------------------------------------------------------------------|-------------------------|-----|--------------------------|------|----|------|
| Berlowitz et al, <sup>27</sup> 2006<br>(N=66,988) | R, O | Hypertension<br>(n=NR)   | Hemorrhagic events were considered “serious” if the <i>ICD-9-CM</i> code was the primary diagnosis from a VA hospitalization | 2546 <sup>g</sup> (1.9) | NR  | AHR, 1.25<br>(1.13-1.38) | <.05 | ↑  | Fair |
| Gasse et al, <sup>18</sup> 2005<br>(N=188)        | R, O | Hypertension<br>(n=81)   | Bleeding events resulting in hospitalization or fatality                                                                     | 45 (NR)                 | .89 | AOR, 0.9 (0.4-1.9)       | NS   | ↔  | Fair |
| Schauer et al, <sup>25</sup> 2005a<br>(N=9345)    | R, O | Hypertension<br>(n=7045) | Inpatient hospitalization for ICH using <i>ICD-9-CM</i> codes                                                                | 158 <sup>d</sup> (0.8)  | NS  | NA                       | NA   | NA | Fair |
| Schauer et al, <sup>25</sup> 2005b<br>(N=9345)    | R, O | Hypertension<br>(n=7045) | GI bleeding requiring hospitalization using <i>ICD-9-CM</i> codes                                                            | 864 <sup>g</sup> (4.6)  | NS  | NA                       | NA   | NA | Fair |
| Fang et al, <sup>17</sup> 2004<br>(N=1190)        | R, O | Hypertension<br>(n=740)  | ICH documented by computed tomography or magnetic resonance imaging                                                          | 170 (NR)                | .10 | NA                       | NA   | NA | Poor |

|                                                           |      |                                                                       |                                                                                                                                                                                                                                                                                                                              |                       |      |                                       |      |    |      |
|-----------------------------------------------------------|------|-----------------------------------------------------------------------|------------------------------------------------------------------------------------------------------------------------------------------------------------------------------------------------------------------------------------------------------------------------------------------------------------------------------|-----------------------|------|---------------------------------------|------|----|------|
| Sam et al, <sup>24</sup><br>2004<br>(N=80)                | R, O | Hypertension<br>defined according<br>to JNC VII<br>criteria<br>(n=55) | Bleeding events<br>resulting in<br>death,<br>hospitalization,<br>or a decrease in<br>Hgb $\geq 2$ g/dL or<br>requiring $\geq 2$<br>units of RBC<br>transfusion                                                                                                                                                               | 16 (NR)               | NS   | NA                                    | NA   | NA | Poor |
| Berwaerts &<br>Webster, <sup>16</sup><br>2000a<br>(N=272) | R, O | Hypertension<br>(n=83)                                                | ICH                                                                                                                                                                                                                                                                                                                          | 68 (NR)               | <.05 | AOR, 2.69<br>(1.04-6.97) <sup>h</sup> | <.05 | ↑  | Fair |
| Berwaerts &<br>Webster, <sup>16</sup><br>2000b<br>(N=168) | R, O | Hypertension<br>(n=58)                                                | Intracerebral<br>hemorrhage                                                                                                                                                                                                                                                                                                  | 42 (NR)               | <.05 | AOR 2.93<br>(0.87-9.87) <sup>h</sup>  | NS   | ↔  | Poor |
| McMahan et<br>al, <sup>32</sup> 1998<br>(N=579)           | R, O | Hypertension<br>(n=304)                                               | Bleeding event<br>in outpatients<br>that (1) was<br>fatal, (2) was<br>life-threatening<br>(led to<br>cardiopulmo-<br>nary arrest,<br>surgical or<br>angiographic<br>intervention to<br>stop the blood<br>loss, or<br>irreversible<br>damage, such<br>as MI, stroke,<br>blindness, or<br>fibrothorax), (3)<br>was potentially | 40 <sup>g</sup> (5.9) | .68  | NA                                    | NA   | NA | Poor |



---

life-threatening  
(led to 2 of 3  
consequences:  
severe blood  
loss,  
hypotension  
(SBP <90 mm  
Hg), and  
critical anemia  
with a  
hematocrit of  
.2), (4) led to  
severe blood  
loss ( $\geq 3$  units of  
blood), (5) led  
to surgical  
treatment, or  
(6) led to  
moderate blood  
loss that was  
acute or  
subacute and  
was not  
explained by  
trauma or  
surgery

---

|                                                      |      |                                                                                                        |                                                                                                                                                                                                                        |                       |    |    |    |    |      |
|------------------------------------------------------|------|--------------------------------------------------------------------------------------------------------|------------------------------------------------------------------------------------------------------------------------------------------------------------------------------------------------------------------------|-----------------------|----|----|----|----|------|
| SPAF,<br>1996<br>(N=555)                             | RCT  | Hypertension<br>(n=289)                                                                                | A bleeding event was called major when it involved the central nervous system; required hospitalization, blood transfusion, and/or surgical intervention; or resulted in permanent functional impairment to any degree | 33 <sup>d</sup> (2.3) | NR | NR | NS | ↔  | Poor |
| Gitter et al, <sup>30</sup><br>1995<br>(N=261)       | R, O | Hypertension<br>(n=122)                                                                                | Classified as a major bleeding event based on bleeding severity index determined independently by 2 physicians                                                                                                         | 18 (8.1)              | NS | NR | NS | ↔  | Poor |
| Hylek &<br>Singer, <sup>19</sup><br>1994a<br>(N=308) | R, O | Hypertension defined as documented in the medical record or use of antihyperten-sive agents<br>(n=148) | Intracerebral hemorrhage                                                                                                                                                                                               | 77 (NR)               | NS | NA | NA | NA | Poor |

|                                              |      |                                                                                                   |                                                                                                           |          |    |    |    |                   |      |
|----------------------------------------------|------|---------------------------------------------------------------------------------------------------|-----------------------------------------------------------------------------------------------------------|----------|----|----|----|-------------------|------|
| Hylek & Singer, <sup>19</sup> 1994b (N=176)  | R, O | Hypertension defined as documented in the medical record or use of antihypertensive agents (n=90) | Subdural hemorrhage                                                                                       | 44 (NR)  | NS | NA | NA | NA                | Poor |
| Cortelazzo et al, <sup>28</sup> 1993 (N=271) | R, O | Hypertension (n=11)                                                                               | Hemorrhagic events requiring hospitalization documented by laboratory data: Hgb decrease of $\geq 2$ g/dL | 39 (2.7) | NS | NR | NS | $\leftrightarrow$ | Poor |

|                                                                       |      |                                                    |                                                                                                                                                                                                                                                                                                                                                                                                                                                   |                        |      |    |    |    |      |
|-----------------------------------------------------------------------|------|----------------------------------------------------|---------------------------------------------------------------------------------------------------------------------------------------------------------------------------------------------------------------------------------------------------------------------------------------------------------------------------------------------------------------------------------------------------------------------------------------------------|------------------------|------|----|----|----|------|
| Fihn et al, <sup>29</sup><br>1993<br>(N=928)                          | R, O | Hypertension<br>(n=NR)                             | Serious<br>bleeding event<br>was defined as<br>a bleeding<br>event requiring<br>treatment or<br>medical<br>evaluation.<br>Examples of<br>serious<br>bleeding<br>included overt<br>GIB, occult<br>GIB if<br>endoscopic or<br>radiographic<br>studies were<br>done, gross<br>hematuria that<br>prompted<br>cystoscopy or<br>intravenous<br>urography or<br>lasted >2 d, and<br>hemoptysis. If<br>blood was<br>transfused, ≤2<br>units were<br>given | 147 <sup>d</sup> (7.5) | NS   | NA | NA | NA | Fair |
| Landefeld &<br>Goldman, <sup>20</sup><br>1989<br>(N=375) <sup>i</sup> | R, O | Systolic blood<br>pressure >140<br>mm Hg<br>(n=54) | Bleeding in<br>outpatients that<br>(1) was fatal,<br>(2) was life-<br>threatening (led<br>to cardiopul-<br>monary arrest,                                                                                                                                                                                                                                                                                                                         | NR (NR)                | <.05 | NA | NA | NA | Poor |

---

surgical or angiographic intervention to stop the blood loss, or irreversible damage, such as MI, stroke, blindness, or fibrothorax), (3) was potentially life-threatening (led to 2 of 3 consequences: severe blood loss, hypotension (SBP<90 mm Hg), and critical anemia with hematocrit  $\leq 0.2$ ), (4) led to severe blood loss ( $\geq 3$  units of blood), (5) led to surgical treatment, or (6) led to moderate blood loss that was acute or subacute and was not explained by trauma or surgery

---

|                                                                          |      |                                      |                                                                                                                                                          |          |       |                        |     |   |      |
|--------------------------------------------------------------------------|------|--------------------------------------|----------------------------------------------------------------------------------------------------------------------------------------------------------|----------|-------|------------------------|-----|---|------|
| Petitti et al, <sup>22</sup><br>1989<br>(N=2029)                         | R,O  | Treated<br>hypertension<br>(n=380)   | Bleeding<br>resulting in<br>death or<br>hospitalization                                                                                                  | 134 (NR) | .05   | AHR 1.4 (0.6-<br>2.5)  | NS  | ↔ | Fair |
| <b>Minor<br/>bleeding<br/>event</b>                                      |      |                                      |                                                                                                                                                          |          |       |                        |     |   |      |
| Abdelhafiz &<br>Wheeldon, <sup>15</sup><br>2008a<br>(N=199) <sup>d</sup> | P, O | History of<br>hypertension<br>(n=58) | Bleeding not<br>requiring<br>hospital<br>admission,<br>emergency<br>procedure,<br>blood<br>transfusion, or<br>with no other<br>medical conse-<br>quences | 47 (NR)  | .001  | AOR 3.3 (1.3-<br>8.1)  | .01 | ↑ | Good |
| Abdelhafiz &<br>Wheeldon, <sup>15</sup><br>2008b<br>(N=203) <sup>e</sup> | P, O | History of<br>hypertension<br>(n=55) | Bleeding not<br>requiring<br>hospital<br>admission,<br>emergency<br>procedure,<br>blood<br>transfusion, or<br>with no other<br>medical conse-<br>quences | 42 (NR)  | 0.008 | AOR 2.3 (1.01-<br>5.4) | .06 | ↑ | Good |
| Petitti et al, <sup>22</sup><br>1989<br>(N=2029)                         | R, O | Treated<br>hypertension<br>(n=380)   | Bleeding not<br>resulting in<br>death or<br>hospitalization                                                                                              | 481 (NR) | NS    | AHR 1.0 (0.8-<br>1.3)  | NS  | ↔ | Fair |
| <b>Any bleeding<br/>event</b>                                            |      |                                      |                                                                                                                                                          |          |       |                        |     |   |      |

---

|                                              |      |                                                                                           |                                                                                                                                                                                                                                                                                                                                                                                                                                                             |          |     |    |    |    |      |
|----------------------------------------------|------|-------------------------------------------------------------------------------------------|-------------------------------------------------------------------------------------------------------------------------------------------------------------------------------------------------------------------------------------------------------------------------------------------------------------------------------------------------------------------------------------------------------------------------------------------------------------|----------|-----|----|----|----|------|
| Poli et al, <sup>33</sup><br>2009<br>(N=783) | P, O | History of<br>hypertension and<br>were taking<br>antihypertensive<br>treatment<br>(n=495) | Combination of<br>major and<br>minor bleeding<br>events where a<br>major bleeding<br>event was<br>defined as fatal,<br>intracranial<br>(documented by<br>imaging),<br>ocular causing<br>blindness,<br>articular, or<br>retroperitoneal;<br>when surgery or<br>transfusion >2<br>blood units<br>were required<br>or when Hgb<br>was $\geq 2$ g/dL; a<br>minor bleeding<br>event was<br>defined as all<br>cases of<br>bleeding not<br>categorized as<br>major | 94 (3.7) | .50 | NA | NA | NA | Fair |
|----------------------------------------------|------|-------------------------------------------------------------------------------------------|-------------------------------------------------------------------------------------------------------------------------------------------------------------------------------------------------------------------------------------------------------------------------------------------------------------------------------------------------------------------------------------------------------------------------------------------------------------|----------|-----|----|----|----|------|

---

---

|                                                                 |      |                                |                                                                                                                                                                                                                                                                 |         |       |                   |      |   |      |
|-----------------------------------------------------------------|------|--------------------------------|-----------------------------------------------------------------------------------------------------------------------------------------------------------------------------------------------------------------------------------------------------------------|---------|-------|-------------------|------|---|------|
| Abdelhafiz & Wheeldon, <sup>15</sup> 2008a (N=199) <sup>d</sup> | P, O | History of hypertension (n=58) | Combination of major and minor bleeding where a major bleeding event was defined as bleeding requiring hospital admission, emergency procedure, and/or blood transfusion; a minor bleeding event was defined as all other bleeding with no medical consequences | 53 (NR) | <.001 | AOR 3.6 (1.5-8.8) | .004 | ↑ | Good |
|-----------------------------------------------------------------|------|--------------------------------|-----------------------------------------------------------------------------------------------------------------------------------------------------------------------------------------------------------------------------------------------------------------|---------|-------|-------------------|------|---|------|

---



|                                                                 |      |                                |                                                                                                                                                                                                                                                                        |                           |     |                       |      |   |      |
|-----------------------------------------------------------------|------|--------------------------------|------------------------------------------------------------------------------------------------------------------------------------------------------------------------------------------------------------------------------------------------------------------------|---------------------------|-----|-----------------------|------|---|------|
| Abdelhafiz & Wheeldon, <sup>15</sup> 2008b (N=203) <sup>e</sup> | P, O | History of hypertension (n=55) | Combination of major and minor bleeding events where a major bleeding event was defined as bleeding requiring hospital admission, emergency procedure, and/or blood transfusion; a minor bleeding event was defined as all other bleeding with no medical consequences | 47 (NR)                   | .01 | AOR, 2.05 (0.91-4.6)  | .08  | ↔ | Fair |
| Berlowitz et al, <sup>27</sup> 2006 (N=66,988)                  | R, O | Hypertension (n=NR)            | The presence of a hemorrhagic event was based on the presence of specific <i>ICD-9-CM</i> codes indicative of a bleeding event                                                                                                                                         | 10,249 <sup>g</sup> (7.7) | NR  | AHR, 1.10 (1.05-1.16) | <.05 | ↑ | Fair |

|                                                |      |                         |                                                                                                                                               |           |    |    |    |   |      |
|------------------------------------------------|------|-------------------------|-----------------------------------------------------------------------------------------------------------------------------------------------|-----------|----|----|----|---|------|
| Gitter et al, <sup>30</sup><br>1995<br>(N=261) | R, O | Hypertension<br>(n=122) | Classified as<br>major or minor<br>bleeding event<br>based on<br>bleeding<br>severity index<br>determined<br>independently<br>by 2 physicians | 27 (12.2) | NS | NR | NS | ↔ | Poor |
|------------------------------------------------|------|-------------------------|-----------------------------------------------------------------------------------------------------------------------------------------------|-----------|----|----|----|---|------|

<sup>a</sup> AHR = adjusted hazard ratio; AOR = adjusted odds ratio; CI = confidence interval; GI = gastrointestinal; GIB = GI bleeding; Hgb = hemoglobin;; *ICD-9-CM* = *International Classification of Diseases, Ninth Revision, Clinical Modification*; ICH = intracranial hemorrhage; JNC = Joint National Committee; MI = myocardial infarction; NA = not available; NR =not reported; NS = not significant; O = observational study; P = prospective; PTY = patient-years; R = retrospective; RBC = red blood cell; RCT = randomized controlled trial; SBP = systolic blood pressure; SPAF = Stroke Prevention in Atrial Fibrillation; VA =Veterans Affairs; “X”R = effect size.

<sup>b</sup> ↑=statistically significant increased effect; ↓=statistically significant decreased effect; ↔=no statistically significant effect.

<sup>c</sup> Quality rated as good, fair, or poor based on study design (prospective vs retrospective), likelihood of type 2 error (underpowered analysis due to insufficient patient-years of follow-up, small number of events, or too homogeneous a population), reliability of bleeding definition (use of a well-defined and accepted definition).

<sup>d</sup> All patients in the group aged ≥75 y.

<sup>e</sup> All patients in the group aged <75 y.

<sup>f</sup> Only Sundsvall subgroup used for multivariate regression.

<sup>g</sup> Number of bleeding events reported.

<sup>h</sup> Multivariate regression based on 50 cases of ICH and 200 controls because of incomplete data; 31 cases of intracerebral hemorrhage and 122 controls because of incomplete data.

<sup>i</sup> Derivation cohort drawn from 565 patients beginning long-term outpatient warfarin therapy.

**TABLE S4. Evidence Depicting the Association Between Age and Warfarin-Associated Bleeding Risk<sup>a</sup>**

| Reference                               | Study design | Covariate                  | Bleeding definition                                                                                                                                                                                                                          | No. of cases/ events (Rate/100 PTY) | Univariate <i>P</i> value | Multivariate “X”R (95% CI) | Multivariate <i>P</i> value | Effect (↑↔↓) <sup>b</sup> | Quality <sup>c</sup> |
|-----------------------------------------|--------------|----------------------------|----------------------------------------------------------------------------------------------------------------------------------------------------------------------------------------------------------------------------------------------|-------------------------------------|---------------------------|----------------------------|-----------------------------|---------------------------|----------------------|
| <i>Major bleeding event</i>             |              |                            |                                                                                                                                                                                                                                              |                                     |                           |                            |                             |                           |                      |
| Lind et al, <sup>31</sup> 2009a (N=719) | P, O         | Linear age per decade (NA) | Major bleeding events were defined as fatal bleeding and/or symptomatic bleeding in a critical area or organ and/or bleeding causing a fall in Hgb level of ≥2 g/dL (≥20 g/L) or leading to transfusion of ≥2 units (≥900 mL) of whole blood | 73 <sup>d</sup> (2.4)               | <.05                      | AHR 1.36 (1.06–1.74)       | <.05                        | ↑                         | Good                 |

---

|                                               |      |                                  |                                                                                                                                                                                                                                                                                                                |                        |      |                         |      |   |      |
|-----------------------------------------------|------|----------------------------------|----------------------------------------------------------------------------------------------------------------------------------------------------------------------------------------------------------------------------------------------------------------------------------------------------------------|------------------------|------|-------------------------|------|---|------|
| Lind et al, <sup>31</sup><br>2009b<br>(N=719) | P, O | Linear age per<br>decade<br>(NA) | Clinically<br>relevant<br>bleeding was<br>defined as a<br>major bleeding<br>event or an<br>overt bleeding<br>event based on<br>objective<br>investigations<br>that caused<br>admission to<br>hospital or<br>prolonged<br>hospital care<br>but did not<br>meet the<br>criteria for a<br>major bleeding<br>event | 113 <sup>d</sup> (3.7) | <.05 | AHR 1.45<br>(1.19–1.78) | <.05 | ↑ | Good |
|-----------------------------------------------|------|----------------------------------|----------------------------------------------------------------------------------------------------------------------------------------------------------------------------------------------------------------------------------------------------------------------------------------------------------------|------------------------|------|-------------------------|------|---|------|

---

|                                                                 |      |                            |                                                                                                                                                                                                                                                                        |           |      |                      |      |   |      |
|-----------------------------------------------------------------|------|----------------------------|------------------------------------------------------------------------------------------------------------------------------------------------------------------------------------------------------------------------------------------------------------------------|-----------|------|----------------------|------|---|------|
| Manzano-Fernández et al, <sup>21</sup> 2009 (N=166)             | R, O | Age >75 y (n=46)           | A major bleeding event was defined as fatal, decrease in blood Hgb level >4 g/dL, need for transfusion of ≥2 units of blood, need for corrective surgery intervention, the occurrence of intracranial or retroperitoneal bleeding, or any combinations of these events | 26 (10.8) | .049 | AHR 2.75 (1.15–6.56) | .023 | ↑ | Fair |
| Wallerstedt et al, <sup>54</sup> 2009 (N=234)                   | R, O | Linear age per decade (NA) | Clinically relevant bleeding, defined as hospital admission due to bleeding                                                                                                                                                                                            | 19 (2.4)  | NA   | AHR 0.62 (0.33–1.18) | .14  | ↔ | Fair |
| Abdelhafiz & Wheeldon, <sup>15</sup> 2008a (N=199) <sup>e</sup> | P, O | Linear age per year (NA)   | Bleeding requiring hospital admission, emergency procedure, and/or blood transfusion                                                                                                                                                                                   | 6 (NR)    | .60  | AOR 1.2 (0.87–1.7)   | .30  | ↔ | Fair |

|                                                                 |      |                          |                                                                                                                                                                                                                                                         |                       |      |                      |     |   |      |
|-----------------------------------------------------------------|------|--------------------------|---------------------------------------------------------------------------------------------------------------------------------------------------------------------------------------------------------------------------------------------------------|-----------------------|------|----------------------|-----|---|------|
| Abdelhafiz & Wheeldon, <sup>15</sup> 2008b (N=203) <sup>f</sup> | P, O | Linear age per year (NA) | Bleeding requiring hospital admission, emergency procedure, and/or blood transfusion                                                                                                                                                                    | 5 (NR)                | .60  | AOR 1.3 (0.93–1.7)   | .10 | ↔ | Fair |
| Lindh et al, <sup>48</sup> 2008 (N=1523)                        | P, O | Linear age per year (NA) | Severe bleedings were defined according to the WHO criteria; lethal, life-threatening, permanently disabling, or leading to hospital admission (emergency department admissions excluded) or prolongation of hospital stay and reviewed by 2 physicians | 33 <sup>d</sup> (2.6) | NR   | AHR 1.02 (0.98–1.06) | NS  | ↔ | Good |
| Suzuki et al, <sup>34</sup> 2007 (N=667)                        | R, O | Age ≥75 y (n=166)        | Bleeding requiring emergent hospitalization and ICHs                                                                                                                                                                                                    | 12 (2.4)              | 0.49 | AOR 1.66 (0.47–5.84) | NS  | ↔ | Poor |

|                                                                                              |      |                                                                                              |                                                                                                                                                                                                                                                                                                                          |                         |    |                                                                                           |                                  |                   |      |
|----------------------------------------------------------------------------------------------|------|----------------------------------------------------------------------------------------------|--------------------------------------------------------------------------------------------------------------------------------------------------------------------------------------------------------------------------------------------------------------------------------------------------------------------------|-------------------------|----|-------------------------------------------------------------------------------------------|----------------------------------|-------------------|------|
| Wallvik et al, <sup>35</sup><br>2007<br>(N=1579) <sup>g</sup>                                | P, O | Linear age per<br>year<br>(NA)                                                               | Bleeding event<br>causing<br>admission or<br>prolonged in-<br>hospital care<br>and all fatal<br>bleeding events                                                                                                                                                                                                          | 114 (NR)                | NA | AOR 1.05<br>(1.03–1.08)                                                                   | <.05                             | ↑                 | Good |
| Berlowitz et<br>al, <sup>27</sup> 2006<br>(N=66,988)                                         | R, O | Age <55 y<br>(n=NR)<br>Age 55–64 y<br>(n=NR)<br>Age 65–74 y<br>(n=NR)<br>Age ≥75 y<br>(n=NR) | Hemorrhagic<br>events were<br>considered<br>”serious” if the<br><i>ICD-9-CM</i><br>code was the<br>primary<br>diagnosis from<br>a VA<br>hospitalization                                                                                                                                                                  | 2546 <sup>d</sup> (1.9) | NR | Referent<br>AHR 1.39<br>(1.14–1.69)<br>AHR 1.47<br>(1.23–1.76)<br>AHR 1.87<br>(1.56–2.24) | Referent<br><.05<br><.05<br><.05 | NA<br>↑<br>↑<br>↑ | Fair |
| Douketis et al, <sup>39</sup><br>2006 and<br>Diener et al, <sup>28</sup><br>2006<br>(N=3665) | P, O | Age ≥75 y<br>(n=1385)                                                                        | Fatal bleeding;<br>clinically overt<br>bleeding<br>associated with<br>a reduction in<br>Hgb level of ≥2<br>g/dL; clinically<br>overt bleeding<br>requiring<br>transfusion of<br>≥2 units of<br>whole blood or<br>erythrocytes;<br>intracerebral<br>bleeding; and<br>bleeding<br>involving a<br>critical<br>anatomic site | 136 (2.7)               | NA | AHR 1.26<br>(1.03–1.52)                                                                   | .02                              | ↑                 | Good |

|                                               |      |                            |                                                                                                                                                                                     |           |      |                       |      |   |      |
|-----------------------------------------------|------|----------------------------|-------------------------------------------------------------------------------------------------------------------------------------------------------------------------------------|-----------|------|-----------------------|------|---|------|
|                                               |      |                            | (intracranial [not intracerebral], intraspinal, intraocular, retroperitoneal, pericardial, or atraumatic intra-articular).                                                          |           |      |                       |      |   |      |
| Fang et al, <sup>40</sup> 2006a (N=13,559)    | P, O | Linear age per decade (NA) | Bleeding defined as fatal, requiring transfusion of ≥2 units packed blood cells, or hemorrhage into a critical anatomic site                                                        | 170 (1.1) | <.05 | ARR 1.2 (1.0-1.4)     | ≤.05 | ↑ | Fair |
| Fang et al, <sup>40</sup> 2006b (N=13,559)    | P, O | Age ≥80 y (n=NR)           | Intracranial hemorrhage                                                                                                                                                             | 72 (0.5)  | <.05 | ARR 1.8 (1.1-3.1)     | <.05 | ↑ | Fair |
| Shireman et al, <sup>36</sup> 2006 (N=19,875) | R, O | Age ≥70 y (n=17,490)       | Bleeding defined as GI and intracranial hemorrhages that resulted in an inpatient admission, which were identified by diagnosis-related group codes and ICD-9CM codes, respectively | 318 (NR)  | NR   | AHR, 1.63 (1.08-2.48) | <.05 | ↑ | Fair |



|                                                   |      |                                  |                                                                                       |                        |        |                                     |      |    |      |
|---------------------------------------------------|------|----------------------------------|---------------------------------------------------------------------------------------|------------------------|--------|-------------------------------------|------|----|------|
| Schauer et al, <sup>25</sup><br>2005a<br>(N=9345) | R, O | Linear age per<br>decade<br>(NA) | Inpatient<br>hospitalization<br>for ICH using<br><i>ICD-9-CM</i><br>codes             | 158 <sup>d</sup> (0.8) | NS     | NA                                  | NA   | NA | Fair |
| Schauer et al, <sup>25</sup><br>2005b<br>(N=9345) | R, O | Linear age per<br>decade<br>(NA) | GI bleeding<br>requiring<br>hospitalization<br>using <i>ICD-9-<br/>CM</i> codes       | 864 <sup>d</sup> (4.6) | NS     | NA                                  | NA   | NA | Poor |
| Fang et al, <sup>17</sup><br>2004<br>(N=1190)     | R,O  | Linear age per 5<br>y<br>(NA)    | ICH<br>documented by<br>computed<br>tomography or<br>magnetic<br>resonance<br>imaging | 170 (NR)               | <0.001 | AOR, 2.5 (1.3-<br>4.7) <sup>h</sup> | <.05 | ↑  | Fair |

---

|                                                |         |                                  |                                                                                                                                                                                                                                                                                                                                                                                                      |          |    |                         |     |   |      |
|------------------------------------------------|---------|----------------------------------|------------------------------------------------------------------------------------------------------------------------------------------------------------------------------------------------------------------------------------------------------------------------------------------------------------------------------------------------------------------------------------------------------|----------|----|-------------------------|-----|---|------|
| Goudie et al, <sup>42</sup><br>2004<br>(N=344) | Unclear | Linear age per<br>decade<br>(NA) | ICH<br>(documented<br>by imaging);<br>surgery or<br>angiographic<br>intervention<br>were required<br>to stop<br>bleeding;<br>bleeding<br>resulted in a<br>reduction in<br>Hgb levels of<br>≥2 g/dL or<br>necessitated<br>transfusion ≥2<br>units of blood;<br>and when<br>bleeding<br>resulted in<br>permanent loss<br>of organ<br>function (ie,<br>intraocular<br>bleeding<br>causing<br>blindness) | 16 (2.4) | NA | AHR 1.25<br>(0.57-2.74) | .58 | ↔ | Fair |
|------------------------------------------------|---------|----------------------------------|------------------------------------------------------------------------------------------------------------------------------------------------------------------------------------------------------------------------------------------------------------------------------------------------------------------------------------------------------------------------------------------------------|----------|----|-------------------------|-----|---|------|

---

|                                            |                        |                         |                                                                                                                                                                                                                    |         |      |                       |     |                   |      |
|--------------------------------------------|------------------------|-------------------------|--------------------------------------------------------------------------------------------------------------------------------------------------------------------------------------------------------------------|---------|------|-----------------------|-----|-------------------|------|
| Kagansky et al, <sup>46</sup> 2004 (N=323) | Combined P, O and R, O | Age $\geq$ 90 y (n=NR)  | Fatal, ocular (with blindness), articular, retroperitoneal, or if bleeding led to surgery, angiographic intervention, reduction of Hgb level of $\geq$ 2 g/dL, or a need for a blood transfusion of $\geq$ 2 packs | 22 (3)  | 0.20 | NR                    | NS  | $\leftrightarrow$ | Poor |
| Sam et al, <sup>24</sup> 2004 (N=80)       | R,O                    | Linear age per 5 y (NA) | Bleeding resulting in death, hospitalization, or a decrease in Hgb $\geq$ 2 g/dL or requiring $\geq$ 2 units of RBC transfusion                                                                                    | 16 (NR) | NS   | AOR, 1.10 (0.84-1.44) | .51 | $\leftrightarrow$ | Fair |

|                                                 |      |                          |                                                                                                                                                                                             |                     |      |                       |      |   |      |
|-------------------------------------------------|------|--------------------------|---------------------------------------------------------------------------------------------------------------------------------------------------------------------------------------------|---------------------|------|-----------------------|------|---|------|
| Shireman et al, <sup>53</sup> 2004 (N=10,093)   | R, O | Linear age per year (NA) | Bleeding defined as GI and intracranial hemorrhages that resulted in an inpatient admission, which were identified by diagnosis-related group codes and <i>ICD-9-CM</i> codes, respectively | 151 (NR)            | <.05 | AOR, 1.03 (1.00–1.05) | ≤.05 | ↑ | Fair |
| Kearon et al, <sup>47</sup> 2003 (N=738)        | RCT  | Age ≥65 y (n=260)        | Clinically overt bleeding resulting in a decrease in Hgb ≥2 g/dL, a need for ≥2 units of RBC transfusion, or involvement of a critical site                                                 | 17 <sup>d</sup> (1) | NR   | AHR, 2.6 (1.0-6.9)    | ≤.05 | ↑ | Fair |
| Ruiz-Irastorza et al, <sup>51</sup> 2002 (N=66) | R, O | Linear age per year (NA) | Defined as intracranial, intraocular, GI, retroperitoneal, or requiring transfusion or admission to a hospital, were considered for the purposes of this study                              | 4 (6)               | NS   | NR                    | NS   | ↔ | Poor |

|                                                  |      |                  |                                                                                                                                                                                                                                                                                                                                                                        |           |    |                                   |      |   |      |
|--------------------------------------------------|------|------------------|------------------------------------------------------------------------------------------------------------------------------------------------------------------------------------------------------------------------------------------------------------------------------------------------------------------------------------------------------------------------|-----------|----|-----------------------------------|------|---|------|
| Berwaerts & Webster, <sup>16</sup> 2000a (N=272) | R, O | Age ≥80 y (n=38) | ICH                                                                                                                                                                                                                                                                                                                                                                    | 68 (NR)   | NS | AOR 1.46 (0.47-4.59) <sup>i</sup> | NS   | ↔ | Poor |
| Berwaerts & Webster, <sup>16</sup> 2000b (N=168) | R, O | Age ≥80 y (n=26) | Intracerebral hemorrhage                                                                                                                                                                                                                                                                                                                                               | 42 (NR)   | NS | AOR 1.38 (0.29-6.48) <sup>i</sup> | NS   | ↔ | Poor |
| White et al, <sup>55</sup> 1999 (N=21,250)       | R, O | Age >65 y (n=NR) | Patients were categorized as having a hospital readmission for bleeding if the principal diagnosis was site-specific bleeding, system-specific bleeding, nonspecific hemorrhage, or prolonged blood clotting with a secondary diagnosis of a site- or system-specific bleeding code. A readmission was also included if the principal diagnosis was a potential source | 298 (0.9) | NR | AHR 1.3 (1.0-1.7)                 | <.05 | ↑ | Fair |

|                                           |      |                   |                                                                                                                                                                                                                                                                                                                                                                                                                                   |                       |      |                                   |      |   |      |
|-------------------------------------------|------|-------------------|-----------------------------------------------------------------------------------------------------------------------------------------------------------------------------------------------------------------------------------------------------------------------------------------------------------------------------------------------------------------------------------------------------------------------------------|-----------------------|------|-----------------------------------|------|---|------|
|                                           |      |                   | of bleeding with a secondary diagnosis bleeding.                                                                                                                                                                                                                                                                                                                                                                                  |                       |      |                                   |      |   |      |
| McMahan et al, <sup>32</sup> 1998 (N=579) | R, O | Age ≥65 y (n=340) | Bleeding in outpatients that (1) was fatal, (2) was life-threatening (led to cardiopulmonary arrest, surgical or angiographic intervention to stop the blood loss, or irreversible damage, such as MI, stroke, blindness, or fibrothorax), (3) was potentially life-threatening (led to 2 of 3 consequences: severe blood loss, hypotension (SBP <90 mm Hg), and critical anemia with a hematocrit ≤0.2), (4) led to severe blood | 40 <sup>d</sup> (5.9) | 0.93 | AHR 1.0 (0.53–1.9) <sup>j,k</sup> | 0.97 | ↔ | Fair |

|                                          |                                            |                          |                                                                                                                                                                                                                        |                       |      |                      |      |   |      |
|------------------------------------------|--------------------------------------------|--------------------------|------------------------------------------------------------------------------------------------------------------------------------------------------------------------------------------------------------------------|-----------------------|------|----------------------|------|---|------|
|                                          |                                            |                          | loss ( $\geq 3$ units of blood), (5) led to surgical treatment, or (6) led to moderate blood loss that was acute or subacute, and was not explained by trauma or surgery.                                              |                       |      |                      |      |   |      |
| SPAF, 1996 (N=555)                       | RCT                                        | Age >75 y (n=200)        | A bleeding event was called major when it involved the central nervous system; required hospitalization, blood transfusion, and/or surgical intervention; or resulted in permanent functional impairment to any degree | 33 <sup>d</sup> (2.3) | .009 | NR                   | .006 | ↑ | Good |
| Fihn et al, <sup>41</sup> 1996a (N=2300) | Combined R, O and P, O (82% of population) | Linear age per year (NA) | Fatal bleeding was defined as bleeding leading directly to the death of                                                                                                                                                | 37 (1)                | NR   | ARR 1.01 (0.99–1.04) | >.20 | ↔ | Fair |

---

enrolled  
prospectivel  
y)

the patient.  
Life-  
threatening  
bleeding was  
defined as  
bleeding  
leading to  
cardiopul-  
monary arrest,  
surgical or  
angiographic  
intervention, or  
irreversible  
sequelae, such  
as MI,  
neurologic  
deficit  
consequent to  
intracerebral  
hemorrhage, or  
massive  
hemothorax.  
Bleeding was  
also considered  
to be life-  
threatening if it  
led to at  $\leq 2$  of  
the following  
consequences:  
loss of  $\geq 3$  units  
of blood;  
systolic  
hypotension  
(SBP  $< 90$  mm  
Hg); or critical  
anemia

---



|                                             |                                                                   |                                                                                                    |                                                                                                                 |           |                      |                       |      |   |      |
|---------------------------------------------|-------------------------------------------------------------------|----------------------------------------------------------------------------------------------------|-----------------------------------------------------------------------------------------------------------------|-----------|----------------------|-----------------------|------|---|------|
|                                             |                                                                   |                                                                                                    | (hematocrit <0.2).                                                                                              |           |                      |                       |      |   |      |
| Fihn et al, <sup>41</sup> 1996b (N=2300)    | Combined R, O and P, O (82% of population enrolled prospectively) | Linear age per year (NA)                                                                           | Serious bleeding was defined as bleeding requiring treatment or medical evaluation                              | 222 (6.1) | NR                   | ARR, 0.99 (0.98-1.00) | .038 | ↔ | Good |
| Gitter et al, <sup>30</sup> 1995 (N=261)    | R, O                                                              | Linear age per year (NA) <sup>1</sup>                                                              | Classified as a major bleeding event based on bleeding severity index determined independent-ly by 2 physicians | 18 (8.1)  | NS                   | AHR, 1.01 (0.98-1.05) | NS   | ↔ | Fair |
| Gitter et al, <sup>30</sup> 1995 (N=261)    | R, O                                                              | Age <65 y (n=101) <sup>1</sup><br>Age 65-74 y (n=78) <sup>1</sup><br>Age ≥75 y (n=82) <sup>1</sup> | Classified as a major bleeding event based on bleeding severity index determined independent-ly by 2 physicians | 18 (8.1)  | Referent<br>NS<br>NS | NR                    | NS   | ↔ | Fair |
| Hylek & Singer, <sup>19</sup> 1994a (N=308) | R, O                                                              | Linear age per decade (NA)                                                                         | Intracerebral hemorrhage                                                                                        | 77 (NR)   | NR                   | AOR, 1.3 (1.0-1.6)    | <.05 | ↑ | Fair |
| Hylek & Singer, <sup>19</sup> 1994b (N=176) | R, O                                                              | Linear age per decade (NA)                                                                         | Subdural hemorrhage                                                                                             | 44 (NR)   | NR                   | AOR, 2.0 (1.3-3.1)    | .002 | ↑ | Fair |

|                                                 |      |                                                             |                                                                                                                    |                        |                      |                    |       |   |      |
|-------------------------------------------------|------|-------------------------------------------------------------|--------------------------------------------------------------------------------------------------------------------|------------------------|----------------------|--------------------|-------|---|------|
| Hylek & Singer, <sup>19</sup> 1994c<br>(N=484)  | R, O | Linear age per decade<br>(NA)                               | Intracranial hemorrhage documented by computed tomography, lumbar puncture, or postmortem examination <sup>m</sup> | 121 <sup>n</sup> (0.6) | NR                   | AOR, 1.4 (1.2-1.7) | <.001 | ↑ | Fair |
| Cortelazzo et al, <sup>28</sup> 1993<br>(N=271) | R, O | Age <40 y (n=48)<br>Age 40–60 y (n=156)<br>Age >60 y (n=67) | Hemorrhagic events requiring hospitalization documented by laboratory data: Hgb fall ≥2 g/dL                       | 39 (2.7)               | Referent<br>NS<br>NS | NR                 | NS    | ↔ | Poor |

|                                                                       |      |                      |                                                                                                                                                                                                                                                                                                                                                                                                                                        |                        |       |                          |      |   |      |
|-----------------------------------------------------------------------|------|----------------------|----------------------------------------------------------------------------------------------------------------------------------------------------------------------------------------------------------------------------------------------------------------------------------------------------------------------------------------------------------------------------------------------------------------------------------------|------------------------|-------|--------------------------|------|---|------|
| Fihn et al, <sup>29</sup><br>1993<br>(N=928)                          | R, O | Age >65 y<br>(n=NR)  | Serious<br>bleeding<br>defined as<br>bleeding<br>requiring<br>treatment or<br>medical<br>evaluation.<br>Examples of<br>serious<br>bleeding<br>included overt<br>GIB, occult<br>GIB if<br>endoscopic, or<br>radiographic<br>studies were<br>done, gross<br>hematuria that<br>prompted<br>cystoscopy or<br>intravenous<br>urography or<br>lasted >2 days,<br>and<br>hemoptysis. If<br>blood was<br>transfused, ≤2<br>units were<br>given | 147 <sup>d</sup> (7.5) | <.05  | AHR, 0.80<br>(0.54-1.02) | >.20 | ↔ | Fair |
| Landefeld &<br>Goldman, <sup>20</sup><br>1989<br>(N=375) <sup>o</sup> | R, O | Age ≥65 y<br>(n=172) | Bleeding in<br>outpatients that<br>(1) was fatal,<br>(2) was life-<br>threatening (led<br>to cardiopul-                                                                                                                                                                                                                                                                                                                                | NR (NR)                | <.001 | AHR, 1.03<br>(NR)        | <.01 | ↑ | Fair |

---

monary arrest,  
surgical or  
angiographic  
intervention to  
stop the blood  
loss, or  
irreversible  
damage, such  
as MI, stroke,  
blindness, or  
fibrothorax),  
(3) was  
potentially life-  
threatening (led  
to 2 of 3 conse-  
quences: severe  
blood loss,  
hypotension  
(SBP <90 mm  
Hg), and  
critical anemia  
with a  
hematocrit  
≤0.2), (4) led to  
severe blood  
loss (≥3 units  
of blood), (5)  
led to surgical  
treatment, or  
(6) led to  
moderate blood  
loss that was  
acute or  
subacute, and  
was not  
explained by

---

|                                                                       |      |                                                                                               |                                                                                                                          |          |     |                         |     |    |      |
|-----------------------------------------------------------------------|------|-----------------------------------------------------------------------------------------------|--------------------------------------------------------------------------------------------------------------------------|----------|-----|-------------------------|-----|----|------|
|                                                                       |      |                                                                                               | trauma or surgery.                                                                                                       |          |     |                         |     |    |      |
| Petitti et al, <sup>22</sup><br>1989<br>(N=2029)                      | R, O | Age ≥75 y<br>(n=137)                                                                          | Bleeding resulting in death or hospitalization                                                                           | 134 (NR) | NS  | NA                      | NA  | NA | Poor |
| Gurwitz et al, <sup>44</sup><br>1988<br>(N=321)                       | R, O | Age <50 y<br>(n=73)<br>Age 50–59 y<br>(n=58)<br>Age 60–69 y<br>(n=104)<br>Age ≥70 y<br>(n=86) | Bleeding requiring hospitalization, transfusion, or discontinuation of warfarin therapy                                  | 14 (NR)  | NS  | NR                      | NS  | ↔  | Poor |
| <b><i>Minor bleeding event</i></b>                                    |      |                                                                                               |                                                                                                                          |          |     |                         |     |    |      |
| Abdelhafiz & Wheeldon, <sup>15</sup><br>2008a<br>(N=199) <sup>e</sup> | P, O | Linear age per year<br>(NA)                                                                   | Bleeding not requiring hospital admission, emergency procedure, blood transfusion, or with no other medical consequences | 47 (NR)  | .20 | AOR, 0.95<br>(0.85-1.1) | .40 | ↔  | Good |

|                                                                 |         |                            |                                                                                                                                                                                                                                                                                                        |          |     |                       |     |   |      |
|-----------------------------------------------------------------|---------|----------------------------|--------------------------------------------------------------------------------------------------------------------------------------------------------------------------------------------------------------------------------------------------------------------------------------------------------|----------|-----|-----------------------|-----|---|------|
| Abdelhafiz & Wheeldon, <sup>15</sup> 2008b (N=203) <sup>f</sup> | P, O    | Linear age per year (NA)   | Bleeding not requiring hospital admission, emergency procedure, blood transfusion, or with no other medical consequences                                                                                                                                                                               | 42 (NR)  | .20 | AOR, 1.0 (0.95-1.1)   | .90 | ↔ | Good |
| Goudie et al, <sup>42</sup> 2004 (N=344)                        | Unclear | Linear age per decade (NA) | Bleeding events resulting in hospitalization for assessment or treatment, except ICH, requiring surgery or angiographic intervention to stop bleeding, reduction in Hgb $\geq 2$ g/dL, or necessitated transfusion $\geq 2$ units of blood, and bleeding resulting in permanent loss of organ function | 27 (4.1) | NA  | AHR, 1.28 (0.83-1.96) | .27 | ↔ | Fair |

|                                                |                                                                      |                             |                                                                                                                                                                                                                                                      |            |     |                          |      |    |      |
|------------------------------------------------|----------------------------------------------------------------------|-----------------------------|------------------------------------------------------------------------------------------------------------------------------------------------------------------------------------------------------------------------------------------------------|------------|-----|--------------------------|------|----|------|
| Kagansky et al, <sup>46</sup> 2004<br>(N=323)  | Combined P, O and R, O                                               | Age ≥90 y<br>(n=NR)         | All cases of bleeding except bleeding that is fatal, ocular (with blindness), articular, retroperitoneal, or if bleeding led to surgery, angiographic intervention, reduction of Hgb level of ≥2 g/dL, or a need for a blood transfusion of ≥2 packs | 20 (2.7)   | .60 | NR                       | NS   | ↔  | Poor |
| Fihn et al, <sup>41</sup> 1996<br>(N=2,300)    | Combined R, O and P, O<br>(82% of population enrolled prospectively) | Linear age per year<br>(NA) | Bleeding with no associated costs or medical consequences                                                                                                                                                                                            | 553 (21.8) | NR  | ARR, 1.01<br>(1.00-1.02) | .001 | ↑  | Good |
| Petitti et al, <sup>22</sup> 1989<br>(N=2,029) | R, O                                                                 | Age ≥75 y<br>(n=137)        | Bleeding not resulting in death or hospitalization                                                                                                                                                                                                   | 481 (NR)   | NS  | NA                       | NA   | NA | Poor |

|                                                 |      |                                                                                               |                                                                                                                                |         |    |    |    |   |      |
|-------------------------------------------------|------|-----------------------------------------------------------------------------------------------|--------------------------------------------------------------------------------------------------------------------------------|---------|----|----|----|---|------|
| Gurwitz et al, <sup>44</sup><br>1988<br>(N=321) | R, O | Age <50 y<br>(n=73)<br>Age 50–59 y<br>(n=58)<br>Age 60–69 y<br>(n=104)<br>Age ≥70 y<br>(n=86) | Bleeding<br>events not<br>requiring<br>hospitaliza-<br>tion,<br>transfusion, or<br>discontinua-<br>tion of warfarin<br>therapy | 61 (NR) | NS | NR | NS | ↔ | Poor |
|-------------------------------------------------|------|-----------------------------------------------------------------------------------------------|--------------------------------------------------------------------------------------------------------------------------------|---------|----|----|----|---|------|

---

*Any bleeding  
event*

---



|                                              |      |                      |                                                                                                                                                                                                                                                                                                                                                                         |          |      |                    |     |   |      |
|----------------------------------------------|------|----------------------|-------------------------------------------------------------------------------------------------------------------------------------------------------------------------------------------------------------------------------------------------------------------------------------------------------------------------------------------------------------------------|----------|------|--------------------|-----|---|------|
| Poli et al, <sup>33</sup><br>2009<br>(N=783) | P, O | Age ≥80 y<br>(n=456) | Combination of major and minor bleeding events where a major bleeding event was defined as fatal, intracranial (documented by imaging), ocular causing blindness, articular, or retroperitoneal; when surgery or transfusion >2 blood units were required or when Hgb was ≥2 g/dL; a minor bleeding event was defined as all cases of bleeding not categorized as major | 94 (3.7) | .002 | AOR, 2.0 (1.1-4.0) | .05 | ↑ | Fair |
|----------------------------------------------|------|----------------------|-------------------------------------------------------------------------------------------------------------------------------------------------------------------------------------------------------------------------------------------------------------------------------------------------------------------------------------------------------------------------|----------|------|--------------------|-----|---|------|

---

|                                                                 |      |                          |                                                                                                                                                                                                                                                                                |         |     |                      |     |   |      |
|-----------------------------------------------------------------|------|--------------------------|--------------------------------------------------------------------------------------------------------------------------------------------------------------------------------------------------------------------------------------------------------------------------------|---------|-----|----------------------|-----|---|------|
| Abdelhafiz & Wheeldon, <sup>15</sup> 2008a (N=199) <sup>e</sup> | P, O | Linear age per year (NA) | Combination of major and minor bleeding events where a major bleeding event was defined as a bleeding event requiring hospital admission, emergency procedure, and/or blood transfusion; a minor bleeding event was defined as all other bleeding with no medical consequences | 53 (NR) | 0.1 | AOR, 0.97 (0.88-1.1) | 0.6 | ↔ | Good |
|-----------------------------------------------------------------|------|--------------------------|--------------------------------------------------------------------------------------------------------------------------------------------------------------------------------------------------------------------------------------------------------------------------------|---------|-----|----------------------|-----|---|------|

---

---

|                                                                 |      |                          |                                                                                                                                                                                                                                                                        |         |     |                     |     |   |      |
|-----------------------------------------------------------------|------|--------------------------|------------------------------------------------------------------------------------------------------------------------------------------------------------------------------------------------------------------------------------------------------------------------|---------|-----|---------------------|-----|---|------|
| Abdelhafiz & Wheeldon, <sup>15</sup> 2008b (N=203) <sup>f</sup> | P, O | Linear age per year (NA) | Combination of major and minor bleeding events where a major bleeding event was defined as bleeding requiring hospital admission, emergency procedure, and/or blood transfusion; a minor bleeding event was defined as all other bleeding with no medical consequences | 47 (NR) | .10 | AOR, 1.0 (0.96-1.1) | .80 | ↔ | Good |
|-----------------------------------------------------------------|------|--------------------------|------------------------------------------------------------------------------------------------------------------------------------------------------------------------------------------------------------------------------------------------------------------------|---------|-----|---------------------|-----|---|------|

---

|                                                 |      |                        |                                                                                                                                                                                                                                                                                    |                        |                |                                       |                |         |      |
|-------------------------------------------------|------|------------------------|------------------------------------------------------------------------------------------------------------------------------------------------------------------------------------------------------------------------------------------------------------------------------------|------------------------|----------------|---------------------------------------|----------------|---------|------|
| Metlay et al, <sup>49</sup><br>2008<br>(N=2346) | P, O | Age <70 y<br>(n=283)   | Warfarin-<br>related                                                                                                                                                                                                                                                               | 111 <sup>d</sup> (4.7) | Referent<br>NS | Referent<br>AIRR, 0.69<br>(0.31-1.51) | Referent<br>NS | NA<br>↔ | Fair |
|                                                 |      | Age 71-75 y<br>(n=539) | bleeding,<br>defined as any                                                                                                                                                                                                                                                        |                        | NS             | AIRR, 1.09<br>(0.52-2.26)             | NS             | ↔       |      |
|                                                 |      | Age 76-80 y<br>(n=663) | hospitalization<br>with clinical                                                                                                                                                                                                                                                   |                        | NS             | AIRR, 1.61<br>(0.78-3.32)             | NS             | ↔       |      |
|                                                 |      | Age 81-85 y<br>(n=577) | signs and<br>symptoms of                                                                                                                                                                                                                                                           |                        |                | AIRR, 1.13<br>(0.43-2.94)             |                |         |      |
|                                                 |      | Age ≥86 y<br>(n=285)   | bleeding with<br>evidence of<br>elevated INR<br>upon<br>admission, a<br>physician's<br>attribution in<br>the discharge<br>summary of the<br>hospitalization<br>as due to<br>warfarin<br>toxicity, or<br>evidence of<br>administration<br>of vitamin K or<br>fresh frozen<br>plasma |                        |                |                                       |                |         |      |

|                                                |      |                                                                                  |                                                                                                                                                                                                                                                                                           |                                                                |    |                                                                                     |                                  |                   |      |
|------------------------------------------------|------|----------------------------------------------------------------------------------|-------------------------------------------------------------------------------------------------------------------------------------------------------------------------------------------------------------------------------------------------------------------------------------------|----------------------------------------------------------------|----|-------------------------------------------------------------------------------------|----------------------------------|-------------------|------|
| Shalansky et al, <sup>52</sup> 2007 (N=171)    | P, O | Linear age per year (NA)                                                         | Bleeding events based on patients' self-assessment, using a checklist of bleeding event types: excessive bruising beyond what the patient typically experiences while taking warfarin, excessive bleeding from a cut, nosebleed, blood in urine, blood in stool, blood in vomit, or other | 359 <sup>d</sup> (NR) (87 patients reported ≥1 bleeding event) | NR | AOR, 1.03 (1.001.06)                                                                | .04                              | ↑                 | Fair |
| Berlowitz et al, <sup>27</sup> 2006 (N=66,988) | R, O | Age <55 y (n=NR)<br>Age 55-64 y (n=NR)<br>Age 65-74 y (n=NR)<br>Age ≥75 y (n=NR) | The presence of a hemorrhagic event was based on the presence of specific ICD-9-CM codes indicative of a bleed                                                                                                                                                                            | 10,249 (7.7)                                                   | NR | Referent<br>AHR, 1.18 (1.07-1.29)<br>AHR, 1.24 (1.14-1.35)<br>AHR, 1.35 (1.24-1.47) | Referent<br><.05<br><.05<br><.05 | NA<br>↑<br>↑<br>↑ | Fair |

|                                                      |                              |                                                                                                |                                                                                                                                                                                                                                                                     |                         |                               |                            |                            |   |      |
|------------------------------------------------------|------------------------------|------------------------------------------------------------------------------------------------|---------------------------------------------------------------------------------------------------------------------------------------------------------------------------------------------------------------------------------------------------------------------|-------------------------|-------------------------------|----------------------------|----------------------------|---|------|
| Bini et al, <sup>37</sup><br>2005<br>(N=210)         | P, O                         | Age 50-59 y<br>(n=NR)<br>Age 60-69 y<br>(n=NR)<br>Age 70-79 y<br>(n=NR)<br>Age ≥80 y<br>(n=NR) | Fecal occult<br>blood test<br>positive with<br>lesions that<br>were<br>considered to<br>be a potential<br>source of<br>occult GIB loss<br>were defined<br>prior to the<br>start of the<br>study and<br>similar to<br>criteria used in<br>other published<br>studies | 124 <sup>d</sup> (11.8) | Referent<br>.23<br>.21<br>.01 | Referent<br>NA<br>NA<br>NR | Referent<br>NA<br>NA<br>NS | ↔ | Poor |
| Ogendo, <sup>50</sup> 2001<br>(N=150)                | Combined<br>R, O and P,<br>O | Linear age per<br>year<br>(NA)                                                                 | No definition<br>provided                                                                                                                                                                                                                                           | 31 <sup>d</sup> (4.2)   | NR                            | AOR, 0.97<br>(NR)          | NS                         | ↔ | Poor |
| Gulløv et al, <sup>43</sup><br>1998, 1999<br>(N=170) | P, O                         | Linear age per<br>year<br>(NA)                                                                 | Any bleeding<br>complication                                                                                                                                                                                                                                        | 46 (13)                 | NA                            | NR                         | NS                         | ↔ | Fair |
| Gitter et al, <sup>30</sup><br>1995<br>(N=261)       | R, O                         | Linear age per<br>year<br>(NA) <sup>l</sup>                                                    | Classified as<br>major or minor<br>bleeding event<br>based on<br>bleeding<br>severity index<br>determined<br>independently<br>by 2 physicians                                                                                                                       | 27 (12.2)               | NS                            | AHR, 1.00<br>(0.98-1.03)   | NS                         | ↔ | Poor |

|                                                |      |                                                                                                             |                                                                                                                                                                                                                                                                                                         |           |                      |    |    |   |      |
|------------------------------------------------|------|-------------------------------------------------------------------------------------------------------------|---------------------------------------------------------------------------------------------------------------------------------------------------------------------------------------------------------------------------------------------------------------------------------------------------------|-----------|----------------------|----|----|---|------|
| Gitter et al, <sup>30</sup><br>1995<br>(N=261) | R, O | Age <65 y<br>(n=101) <sup>↓</sup><br>Age 65–74 r<br>(n=78) <sup>↓</sup><br>Age ≥75 r<br>(n=82) <sup>↓</sup> | Classified as<br>major or minor<br>bleeding event<br>based on<br>bleeding<br>severity index<br>determined<br>independently<br>by 2 physicians                                                                                                                                                           | 27 (12.2) | Referent<br>NS<br>NS | NR | NS | ↔ | Poor |
| Isaacs et al, <sup>45</sup><br>1994<br>(N=215) | R, O | Age 55–64 y<br>(n=20) <sup>P</sup><br>Age 65–74 y<br>(n=37)<br>Age 75–84 y<br>(n=95)<br>Age ≥85 y<br>(n=63) | Bleeding<br>complication<br>defined as any<br>clinically<br>visible<br>evidence of<br>bleeding, such<br>as from a<br>respiratory site,<br>microscopic or<br>macroscopic<br>hematuria,<br>major or minor<br>GI bleeding, or<br>an unusually<br>large<br>hematoma as<br>recorded in the<br>progress notes | 27 (NR)   | NS                   | NR | NS | ↔ | Poor |

<sup>a</sup> AHR = adjusted hazard ratio; AIRR = adjusted incidence rate ratio; AOR = adjusted odds ratio; ARR = adjusted relative risk; CI = confidence interval; GI = gastrointestinal; GIB = GI bleeding; Hgb = hemoglobin; *ICD-9-CM* = *International Classification of Diseases, Ninth Revision, Clinical Modification*; ICH = intracranial hemorrhage; INR = International normalized ratio; MI = myocardial infarction; NA = not available; NR = not reported; NS = not significant; O = observational study; P = prospective; PTY = patient-years; R = retrospective; RBC = red blood cell; RCT = randomized controlled trial; SBP = systolic blood pressure; SPAF = Stroke Prevention in Atrial Fibrillation; VA = Veteran Affairs; WHO = World Health Organization; “X”R = effect size.

<sup>b</sup> ↑ = statistically significant increased effect; ↓ = statistically significant decreased effect; ↔ = no statistically significant effect.

<sup>c</sup> Quality rated as good, fair, or poor based on study design (prospective vs retrospective), likelihood of type 2 error (underpowered analysis due to insufficient patient-years of follow-up, small number of event, or too homogeneous a population), reliability of bleeding definition (use of a well-defined and accepted definition).

<sup>d</sup> Number of bleeding events reported.

<sup>e</sup> All patients in the group aged  $\geq 75$  y.

<sup>f</sup> All patients in the group aged  $< 75$  y.

<sup>g</sup> Only Sundsvall subgroup used for multivariate regression.

<sup>h</sup> Only 145 cases and 870 corresponding controls evaluated in multivariate analysis because of missing data.

<sup>i</sup> Multivariate regression based on 50 cases of ICH and 200 controls because of incomplete data; 31 cases of intracerebral hemorrhage and 122 controls because of incomplete data.

<sup>j</sup> Calculated based on denominator of 565 because outcomes data were lacking for some patients.

<sup>k</sup> Results from both the literature and data-based models are reported; history of GIB result taken from the data-based model.

<sup>l</sup> Age was analyzed as both continuous and categorical variables.

<sup>m</sup> For all patients except 1 patient.

<sup>n</sup> Combined intracerebral and subdural hemorrhage patients.

<sup>o</sup> Derivation cohort drawn from 565 patients beginning long-term outpatient warfarin therapy.

<sup>p</sup> Referent group.



**TABLE S5. Evidence Depicting the Association Between Diabetes and Warfarin-Associated Bleeding Risk<sup>a</sup>**

| Reference                               | Study design | Covariate       | Bleeding definition                                                                                                                                                                                                                           | No. Cases/ Events (Rate/100 PTY) | Univariate P value | Multivariate “X”R (95% CI) | Multivariate P value | Effect (↑ ↔ ↓) <sup>b</sup> | Quality <sup>c</sup> |
|-----------------------------------------|--------------|-----------------|-----------------------------------------------------------------------------------------------------------------------------------------------------------------------------------------------------------------------------------------------|----------------------------------|--------------------|----------------------------|----------------------|-----------------------------|----------------------|
| <i>Major bleeding event</i>             |              |                 |                                                                                                                                                                                                                                               |                                  |                    |                            |                      |                             |                      |
| Lind et al, <sup>31</sup> 2009a (N=356) | P, O         | Diabetes (n=NR) | Major bleeding events were defined as fatal bleeding and/or symptomatic bleeding in a critical area or organ and/or bleeding causing a fall in Hgb level of ≥2 g/dL (≥20 g/L) or leading to transfusion of >2 units (>900 mL) of whole blood. | NR                               | NS                 | NA                         | NA                   | NA                          | Poor                 |

|                                                        |      |                             |                                                                                                                                                                                                                                                                        |           |      |    |    |    |      |
|--------------------------------------------------------|------|-----------------------------|------------------------------------------------------------------------------------------------------------------------------------------------------------------------------------------------------------------------------------------------------------------------|-----------|------|----|----|----|------|
| Lind et al, <sup>31</sup><br>2009b<br>(N=356)          | P, O | Diabetes<br>(n=NR)          | Clinically relevant bleeding was defined as a major or an overt bleeding event based on objective investigations that caused admission to hospital or prolonged hospital care but did not meet the criteria for a major bleeding event                                 | NR        | NS   | NA | NA | NA | Poor |
| Manzano-Fernández et al, <sup>21</sup> 2009<br>(N=166) | R, O | Diabetes mellitus<br>(n=88) | A major bleeding event was defined as fatal, decrease in blood Hgb level >4 g/dL, need for transfusion of ≥2 units of blood, need for corrective surgery intervention, the occurrence of intracranial or retroperitoneal bleeding, or any combinations of these events | 26 (10.8) | .717 | NA | NA | NA | Fair |

|                                                                 |      |                                                            |                                                                                                                                                                                                      |          |      |                       |      |   |      |
|-----------------------------------------------------------------|------|------------------------------------------------------------|------------------------------------------------------------------------------------------------------------------------------------------------------------------------------------------------------|----------|------|-----------------------|------|---|------|
| Abdelhafiz & Wheeldon, <sup>15</sup> 2008a (N=199) <sup>d</sup> | P, O | History of diabetes mellitus (n=25)                        | Bleeding requiring hospital admission, emergency procedure, and/or blood transfusion                                                                                                                 | 6 (NR)   | 0.7  | AOR, 1.3 (0.29-7.3)   | 0.7  | ↔ | Fair |
| Abdelhafiz & Wheeldon, <sup>15</sup> 2008b (N=203) <sup>e</sup> | P, O | History of diabetes mellitus (n=36)                        | Bleeding requiring hospital admission, emergency procedure, and/or blood transfusion                                                                                                                 | 5 (NR)   | 0.2  | AOR, 4.8 (0.06-362)   | 0.5  | ↔ | Fair |
| Poli et al, <sup>23</sup> 2007 (N=290)                          | P, O | Diabetes mellitus defined according to ADA criteria (n=57) | Fatal, intracranial (documented by imaging), ocular causing blindness, articular, or retroperitoneal, when surgery or transfusion of >2 blood units were required or when Hgb was reduced by ≥2 g/dL | 17 (2.1) | 0.09 | AOR, 4.4 (1.3-14.7)   | 0.01 | ↑ | Good |
| Suzuki et al, <sup>34</sup> 2007 (N=667)                        | R, O | Diabetes mellitus (n=93)                                   | Bleeding requiring emergent hospitalization and ICHs                                                                                                                                                 | 12 (2.4) | 0.57 | AOR, 0.53 (0.06-4.37) | NS   | ↔ | Poor |

|                                                         |      |                                                                                  |                                                                                                                                                                                             |                         |     |                                                |          |        |      |
|---------------------------------------------------------|------|----------------------------------------------------------------------------------|---------------------------------------------------------------------------------------------------------------------------------------------------------------------------------------------|-------------------------|-----|------------------------------------------------|----------|--------|------|
| Wallvik et al, <sup>35</sup> 2007 (N=1579) <sup>f</sup> | P, O | Diabetes mellitus (n=313)                                                        | Bleeding event causing admission or prolonged in-hospital care and all fatal bleeding events                                                                                                | 114 (NR)                | NA  | AOR, 0.8 (0.5-1.3)                             | NS       | ↔      | Good |
| Berlowitz et al, <sup>27</sup> 2006 (N=66,988)          | R, O | Diabetes (n=31,270)<br>Without complications (n=NR)<br>With complications (n=NR) | Hemorrhagic events were considered <i>serious</i> if the <i>ICD-9-CM</i> code was the primary diagnosis from a VA hospitalization                                                           | 2546 <sup>g</sup> (1.9) | NR  | AHR, 1.05 (0.96-1.15)<br>AHR, 1.03 (0.96-1.10) | NS<br>NS | ↔<br>↔ | Fair |
| Shireman et al, <sup>36</sup> 2006 (N=19,875)           | R, O | Diabetes mellitus (n=5883)                                                       | Bleeding defined as GI and intracranial hemorrhages that resulted in an inpatient admission, which were identified by diagnosis-related group codes and <i>ICD-9-CM</i> codes, respectively | 318 (NR)                | NR  | AHR, 1.31 (1.04-1.66)                          | <.05     | ↑      | Fair |
| Gasse et al, <sup>18</sup> 2005 (N=188)                 | R, O | Diabetes mellitus (n=18)                                                         | Bleeding events resulting in hospitalization or fatality                                                                                                                                    | 45 (NR)                 | .33 | AOR, 1.7 (0.5-6.8)                             | NS       | ↔      | Poor |

|                                                  |      |                                                                                                                                   |                                                                                                                                       |                        |      |                                    |    |    |      |
|--------------------------------------------------|------|-----------------------------------------------------------------------------------------------------------------------------------|---------------------------------------------------------------------------------------------------------------------------------------|------------------------|------|------------------------------------|----|----|------|
| Schauer et al, <sup>25</sup> 2005a (N=9345)      | R, O | Diabetes mellitus (n=4290)                                                                                                        | Inpatient hospitalization for ICH using <i>ICD-9-CM</i> codes                                                                         | 158 <sup>g</sup> (0.8) | NS   | NA                                 | NA | NA | Fair |
| Schauer et al, <sup>25</sup> 2005b (N=9345)      | R, O | Diabetes mellitus (n=4290)                                                                                                        | GI bleeding requiring hospitalization using <i>ICD-9-CM</i> codes                                                                     | 864 <sup>g</sup> (4.6) | NS   | AHR 1.03 (0.90-1.18)               | NS | ↔  | Fair |
| Fang et al, <sup>17</sup> 2004 (N=1190)          | R, O | Diabetes mellitus (n=246)                                                                                                         | ICH documented by computed tomography or magnetic resonance imaging                                                                   | 170 (NR)               | >.20 | NA                                 | NA | NA | Poor |
| Sam et al, <sup>24</sup> 2004 (N=80)             | R, O | Diabetes mellitus defined as a nonfasting blood glucose level of 200 mg/dL or use of insulin or an oral hypoglycemic agent (n=13) | Bleeding event resulting in death, hospitalization, or a decrease in Hgb $\geq$ 2 g/dL or requiring $\geq$ 2 units of RBC transfusion | 16 (NR)                | NS   | NR                                 | NS | ↔  | Poor |
| Berwaerts & Webster, <sup>16</sup> 2000a (N=272) | R, O | Diabetes mellitus (n=42)                                                                                                          | ICH                                                                                                                                   | 68 (NR)                | NS   | AOR, 0.36 (0.10-1.32) <sup>h</sup> | NS | ↔  | Fair |
| Berwaerts & Webster, <sup>16</sup> 2000b (N=168) | R, O | Diabetes mellitus (n=30)                                                                                                          | Intracerebral hemorrhage                                                                                                              | 42 (NR)                | NS   | AOR, 0.39 (0.08-1.93) <sup>h</sup> | NS | ↔  | Fair |
| McMahan et                                       | R, O | Diabetes                                                                                                                          | Bleeding event in                                                                                                                     | 40 <sup>g</sup> (5.9)  | .27  | NA                                 | NA | NA | Poor |

---

al,<sup>32</sup> 1998  
(N=579)

mellitus  
(n=150)

outpatients that  
(1) was fatal, (2)  
was life-  
threatening (led  
to cardiopulmo-  
nary arrest,  
surgical or  
angiographic  
intervention to  
stop the blood  
loss, or  
irreversible  
damage, such as  
MI, stroke,  
blindness, or  
fibrothorax), (3)  
was potentially  
life-threatening  
(led to 2 of 3  
consequences:  
severe blood loss,  
hypotension  
[SBP <90 mm  
Hg), and critical  
anemia with a  
hematocrit  $\leq 0.2$ ),  
(4) led to severe  
blood loss ( $\geq 3$   
units of blood),  
(5) led to surgical  
treatment, or (6)  
led to moderate  
blood loss that  
was acute or  
subacute, and  
was not

---

|                                                      |      |                                |                                                                                                                                                                                                                                                               |                       |     |    |    |    |      |
|------------------------------------------------------|------|--------------------------------|---------------------------------------------------------------------------------------------------------------------------------------------------------------------------------------------------------------------------------------------------------------|-----------------------|-----|----|----|----|------|
|                                                      |      |                                | explained by<br>trauma or surgery                                                                                                                                                                                                                             |                       |     |    |    |    |      |
| SPAF, 1996<br>(N=555)                                | RCT  | Diabetes<br>(n=78)             | A bleeding event<br>was called major<br>when it involved<br>the central nervous<br>system; required<br>hospitalization,<br>blood transfusion,<br>and/or surgical<br>intervention; or<br>resulted in<br>permanent<br>functional<br>impairment to any<br>degree | 33 <sup>g</sup> (2.3) | .09 | NA | NA | NA | Poor |
| Hylek &<br>Singer, <sup>19</sup><br>1994a<br>(N=308) | R, O | Diabetes<br>mellitus<br>(n=52) | Intracerebral<br>hemorrhage                                                                                                                                                                                                                                   | 77 (NR)               | NS  | NA | NA | NA | Poor |
| Hylek &<br>Singer, <sup>19</sup><br>1994b<br>(N=176) | R, O | Diabetes<br>mellitus<br>(n=27) | Subdural<br>hemorrhage                                                                                                                                                                                                                                        | 44 (NR)               | NS  | NA | NA | NA | Poor |

|                                                  |      |                                           |                                                                                                                                                                                                                                                                                                                                                                                                                     |                        |    |                        |    |                   |      |
|--------------------------------------------------|------|-------------------------------------------|---------------------------------------------------------------------------------------------------------------------------------------------------------------------------------------------------------------------------------------------------------------------------------------------------------------------------------------------------------------------------------------------------------------------|------------------------|----|------------------------|----|-------------------|------|
| Fihn et al, <sup>29</sup><br>1993<br>(N=928)     | R, O | Diabetes<br>mellitus<br>(n=NR)            | Serious bleeding<br>defined as<br>bleeding requiring<br>treatment or<br>medical<br>evaluation.<br>Examples of<br>serious bleeding<br>included overt<br>GIB, occult GIB<br>if endoscopic or<br>radiographic<br>studies were done,<br>gross hematuria<br>that prompted<br>cystoscopy or<br>intravenous<br>urography or<br>lasted >2 d, and<br>hemoptysis. If<br>blood was<br>transfused, $\leq 2$<br>units were given | 147 <sup>§</sup> (7.5) | NS | NA                     | NA | NA                | Poor |
| Petitti et al, <sup>22</sup><br>1989<br>(N=2029) | R, O | Treated<br>diabetes<br>mellitus<br>(n=75) | Bleeding event<br>resulting in death<br>or hospitalization                                                                                                                                                                                                                                                                                                                                                          | 134 (NR)               | NS | AHR, 1.1 (0.6-<br>2.5) | NS | $\leftrightarrow$ | Fair |
| <b>Minor<br/>bleeding<br/>events</b>             |      |                                           |                                                                                                                                                                                                                                                                                                                                                                                                                     |                        |    |                        |    |                   |      |



|                                                                 |      |                                     |                                                                                                                                     |          |     |                      |     |   |      |
|-----------------------------------------------------------------|------|-------------------------------------|-------------------------------------------------------------------------------------------------------------------------------------|----------|-----|----------------------|-----|---|------|
| Abdelhafiz & Wheeldon, <sup>15</sup> 2008a (N=199) <sup>d</sup> | P, O | History of diabetes mellitus (n=25) | Bleeding event not requiring hospital admission, emergency procedure, or blood transfusion or having no other medical consequences  | 47 (NR)  | 0.6 | AOR, 0.35 (0.09-1.4) | 0.1 | ↔ | Fair |
| Abdelhafiz & Wheeldon, <sup>15</sup> 2008b (N=203) <sup>e</sup> | P, O | History of diabetes mellitus (n=36) | Bleeding event not requiring hospital admission, emergency procedure, or blood transfusion, or having no other medical consequences | 42 (NR)  | 0.3 | AOR, 0.6 (0.19-1.9)  | 0.4 | ↔ | Fair |
| Petitti et al, <sup>22</sup> 1989 (N=2029)                      | R, O | Treated diabetes mellitus (n=75)    | Bleeding event not resulting in death or hospitalization                                                                            | 481 (NR) | NS  | AHR, 0.6 (0.3-1.1)   | NS  | ↔ | Fair |

---

***Any Bleeding***

---

|                                                                 |      |                                     |                                                                                                                                                                                                                                                                                  |         |     |                     |     |   |      |
|-----------------------------------------------------------------|------|-------------------------------------|----------------------------------------------------------------------------------------------------------------------------------------------------------------------------------------------------------------------------------------------------------------------------------|---------|-----|---------------------|-----|---|------|
| Abdelhafiz & Wheeldon, <sup>15</sup> 2008a (N=199) <sup>d</sup> | P, O | History of diabetes mellitus (n=25) | Combination of major and minor bleeding events where a major bleeding event was defined as bleeding requiring hospital admission, emergency procedure, and/or blood transfusion and a minor bleeding event was defined as all other bleeding events with no medical consequences | 53 (NR) | .40 | AOR, 0.3 (0.08-1.2) | .09 | ↔ | Fair |
|-----------------------------------------------------------------|------|-------------------------------------|----------------------------------------------------------------------------------------------------------------------------------------------------------------------------------------------------------------------------------------------------------------------------------|---------|-----|---------------------|-----|---|------|

|                                                                 |      |                                                                                  |                                                                                                                                                                                                                                                                                   |              |     |                                                |              |        |      |
|-----------------------------------------------------------------|------|----------------------------------------------------------------------------------|-----------------------------------------------------------------------------------------------------------------------------------------------------------------------------------------------------------------------------------------------------------------------------------|--------------|-----|------------------------------------------------|--------------|--------|------|
| Abdelhafiz & Wheeldon, <sup>15</sup> 2008b (N=203) <sup>e</sup> | P, O | History of diabetes mellitus (n=36)                                              | Combination of major and minor bleeding events where a major bleeding event was defined as a bleeding event requiring hospital admission, emergency procedure, and/or blood transfusion and a minor bleeding event was defined as all other bleeding with no medical consequences | 47 (NR)      | .50 | AOR, 0.77 (0.27-2.2)                           | .60          | ↔      | Fair |
| Berlowitz et al, <sup>27</sup> 2006 (N=66,988)                  | R, O | Diabetes (n=31,270)<br>Without complications (n=NR)<br>With complications (n=NR) | The presence of a hemorrhagic event was based on the presence of specific <i>ICD-9-CM</i> codes indicative of a bleed                                                                                                                                                             | 10,249 (7.7) | NR  | AHR, 1.08 (1.03-1.13)<br>AHR, 1.12 (1.09-1.16) | <.05<br><.05 | ↑<br>↑ | Fair |

<sup>a</sup> ADA = American Diabetes Association; AHR=adjusted hazard ratio; AOR = adjusted odds ratio; CI = confidence interval; GI = gastrointestinal; GIB = GI bleeding; Hgb = hemoglobin; *ICD-9-CM* = *International Classification of Diseases, Ninth Revision, Clinical Modification*; ICH=intracranial hemorrhage; MI=myocardial infarction; NA=not applicable; NR = not reported; NS = not significant; O = observational study; P = prospective; PTY =patient-years; R = retrospective; RBC = red blood cell; RCT =randomized controlled trial; SB P= systolic blood pressure; SPAF = Stroke Prevention in Atrial Fibrillation; VA = Veterans Affairs; “X”R = effect size.

<sup>b</sup> ↑=statistically significant increased effect; ↓=statistically significant decreased effect; ↔=no statistically significant effect.

<sup>c</sup> Quality rated as good, fair, or poor based on study design (prospective vs retrospective), likelihood of type 2 error (underpowered analysis due to insufficient patient-years of follow-up, small number of events, or too homogeneous a population), reliability of bleeding definition (use of a well-defined and accepted definition).

<sup>d</sup> All patients in the group aged  $\geq 75$  y.

<sup>e</sup> All patients in the group aged  $< 75$  y.

<sup>f</sup> Only Sundsvall subgroup used for multivariate regression.

<sup>g</sup> Number of bleeding events reported.

<sup>h</sup> Multivariate regression based on 50 cases of ICH and 200 controls because of incomplete data; 31 cases of intracerebral hemorrhage and 122 controls because of incomplete data.

**TABLE S6. Evidence Depicting the Association Between Prior Stroke/TIA (CVD) and Warfarin-Associated Bleeding Risk<sup>a</sup>**

| Reference                                                       | Study design | Covariate                                         | Bleeding definition                                                                  | No. of cases/<br>events<br>(Rate/100<br>PTY) | Univariate<br><i>P</i> -value | Multivariate<br>“X”R (95%<br>CI) | Multivariate<br><i>P</i> value | Effect<br>(↑ ↔ ↓) <sup>b</sup> | Quality <sup>c</sup> |
|-----------------------------------------------------------------|--------------|---------------------------------------------------|--------------------------------------------------------------------------------------|----------------------------------------------|-------------------------------|----------------------------------|--------------------------------|--------------------------------|----------------------|
| <i>Major bleeding event</i>                                     |              |                                                   |                                                                                      |                                              |                               |                                  |                                |                                |                      |
| Abdelhafiz & Wheeldon, <sup>15</sup> 2008a (N=199) <sup>d</sup> | P, O         | History of ischemic cerebrovascular stroke (n=60) | Bleeding requiring hospital admission, emergency procedure, and/or blood transfusion | 6 (NR)                                       | .50                           | AOR, 0.54 (0.02-11.8)            | .70                            | ↔                              | Fair                 |
| Abdelhafiz & Wheeldon, <sup>15</sup> 2008b (N=203) <sup>e</sup> | P, O         | History of ischemic cerebrovascular stroke (n=38) | Bleeding requiring hospital admission, emergency procedure, and/or blood transfusion | 5 (NR)                                       | .30                           | AOR, 15.9 (0.19-135)             | .20                            | ↔                              | Fair                 |

|                                                   |      |                                                                                                                                                                                                                                                            |                                                                                                                                                                                                                               |                         |     |                       |      |   |      |
|---------------------------------------------------|------|------------------------------------------------------------------------------------------------------------------------------------------------------------------------------------------------------------------------------------------------------------|-------------------------------------------------------------------------------------------------------------------------------------------------------------------------------------------------------------------------------|-------------------------|-----|-----------------------|------|---|------|
| Poli et al, <sup>23</sup><br>2007<br>(N=290)      | P, O | Stroke defined rapidly developing clinical symptoms and/or signs of focal and at times global loss of brain function, lasting >24 hours, and with no apparent cause other than vascular; or TIA defined as a neurological defect lasting <24 hours (n=111) | Fatal, intracranial (documented by imaging), ocular causing blindness, articular, or retroperitoneal, when surgery or transfusion of >2 blood units (>900 mL) were required or when Hgb was reduced by $\geq 2$ g/dL (20 g/L) | 17 (2.1)                | .01 | AOR, 3.6 (1.1-11.6)   | .03  | ↑ | Good |
| Berlowitz et al, <sup>27</sup> 2006<br>(N=66,988) | R, O | Stroke (n=12,556)                                                                                                                                                                                                                                          | Hemorrhagic events were considered "serious" if the <i>ICD-9-CM</i> code was the primary diagnosis from a VA hospitalization                                                                                                  | 2546 <sup>f</sup> (1.9) | NR  | AHR, 1.25 (1.14-1.38) | <.05 | ↑ | Fair |

|                                                        |      |                                                                                                          |                                                                                                                                                                |          |       |                                    |      |    |      |
|--------------------------------------------------------|------|----------------------------------------------------------------------------------------------------------|----------------------------------------------------------------------------------------------------------------------------------------------------------------|----------|-------|------------------------------------|------|----|------|
| Fang et al, <sup>17</sup><br>2004<br>(N=1190)          | R, O | History of cerebrovascular disease defined as previous ischemic stroke or carotid artery disease (n=267) | ICH documented by computed tomography or magnetic resonance imaging                                                                                            | 170 (NR) | <.001 | AOR, 2.2 (1.4-3.4) <sup>g</sup>    | <.05 | ↑  | Fair |
| Sam et al, <sup>24</sup><br>2004<br>(N=80)             | R, O | Stroke (n=19)                                                                                            | Bleeding resulting in death, hospitalization, or a decrease in Hgb $\geq 2$ g/dL or requiring $\geq 2$ units of RBC transfusion                                | 16 (NR)  | NS    | NA                                 | NA   | NA | Poor |
| Ruiz-Irastorza et al, <sup>51</sup><br>2002<br>(N=66)  | R, O | Previous stroke (n=38)                                                                                   | Defined as intracranial, intraocular, GI, retroperitoneal, or requiring transfusion or admission to a hospital, were considered for the purposes of this study | 4 (6)    | NS    | NR                                 | NS   | ↔  | Poor |
| Berwaerts & Webster, <sup>16</sup><br>2000a<br>(N=272) | R, O | Cerebrovascular disease (n=81)                                                                           | ICH                                                                                                                                                            | 68 (NR)  | <.05  | AOR, 2.32 (0.98-5.46) <sup>h</sup> | NS   | ↔  | Poor |
| Berwaerts & Webster, <sup>16</sup><br>2000b<br>(N=168) | R, O | Cerebrovascular disease (n=47)                                                                           | Intracerebral hemorrhage                                                                                                                                       | 42 (NR)  | <.05  | AOR, 3.01 (0.97-9.40) <sup>h</sup> | NS   | ↔  | Poor |

|                                                  |      |                          |                                                                                                                                                                                                                                                                                                                                                                                                                        |                       |     |                                      |     |    |      |
|--------------------------------------------------|------|--------------------------|------------------------------------------------------------------------------------------------------------------------------------------------------------------------------------------------------------------------------------------------------------------------------------------------------------------------------------------------------------------------------------------------------------------------|-----------------------|-----|--------------------------------------|-----|----|------|
| White et al, <sup>55</sup><br>1999<br>(N=21,250) | R, O | Prior stroke<br>(n=1317) | Patients were categorized as having a hospital readmission for bleeding if the principal diagnosis was site-specific bleeding, system-specific bleeding, nonspecific hemorrhage, or prolonged blood clotting with a secondary diagnosis of a site- or system-specific bleeding code. A readmission was also included if the principal diagnosis was a potential source of bleeding with a secondary diagnosis bleeding | 298 (0.9)             | .30 | NA                                   | NA  | NA | Fair |
| McMahan et al, <sup>32</sup> 1998<br>(N=579)     | R, O | Stroke<br>(n=74)         | Bleeding in outpatients that (1) was fatal, (2) was life-threatening (led to cardiopulmonary arrest, surgical or                                                                                                                                                                                                                                                                                                       | 40 <sup>†</sup> (5.9) | .71 | AHR, 1.2<br>(0.50-2.9) <sup>ij</sup> | .68 | ↔  | Fair |



---

angiographic  
intervention to  
stop the blood  
loss, or  
irreversible  
damage, such as  
MI, stroke,  
blindness, or  
fibrothorax), (3)  
was potentially  
life-threatening  
(led to 2 of 3  
consequences:  
severe blood loss,  
hypotension (SBP  
<90 mm Hg), and  
critical anemia  
with a hematocrit  
≤0.2), (4) led to  
severe blood loss  
(≥3 units of  
blood), (5) led to  
surgical  
treatment, or (6)  
led to moderate  
blood loss that  
was acute or  
subacute, and was  
not explained by  
trauma or surgery

---

|                                                      |      |                                                                                                                               |                                                                                                                                  |          |      |                        |       |    |      |
|------------------------------------------------------|------|-------------------------------------------------------------------------------------------------------------------------------|----------------------------------------------------------------------------------------------------------------------------------|----------|------|------------------------|-------|----|------|
| Gitter et al, <sup>30</sup><br>1995<br>(N=261)       | R, O | TIA<br>(n=40)                                                                                                                 | Classified as a<br>major bleeding<br>event based on<br>bleeding severity<br>index determined<br>independently by<br>2 physicians | 18 (8.1) | NS   | NR                     | NS    | ↔  | Poor |
| Gitter et al, <sup>30</sup><br>1995<br>(N=261)       | R, O | Stroke<br>(n=49)                                                                                                              | Classified as a<br>major bleeding<br>event based on<br>bleeding severity<br>index determined<br>independently by<br>2 physicians | 18 (8.1) | NS   | NR                     | NS    | ↔  | Poor |
| Hylek &<br>Singer, <sup>19</sup><br>1994a<br>(N=308) | R, O | Cerebrovas-<br>cular disease<br>defined as<br>carotid/<br>vertebro-<br>basilar disease,<br>or history of<br>stroke<br>(n=125) | Intracerebral<br>hemorrhage                                                                                                      | 77 (NR)  | <.05 | AOR, 3.1 (1.7-<br>5.6) | <.001 | ↑  | Fair |
| Hylek &<br>Singer, <sup>19</sup><br>1994b<br>(N=176) | R, O | Cerebrovas-<br>cular disease<br>defined as<br>carotid/<br>vertebro-<br>basilar disease,<br>or history of<br>stroke<br>(n=58)  | Subdural<br>hemorrhage                                                                                                           | 44 (NR)  | NS   | NA                     | NA    | NA | Poor |

|                                                                    |      |                                                                                                   |                                                                                                                                                                                                                                                                                                                                                                                                                      |                        |       |                    |       |   |      |
|--------------------------------------------------------------------|------|---------------------------------------------------------------------------------------------------|----------------------------------------------------------------------------------------------------------------------------------------------------------------------------------------------------------------------------------------------------------------------------------------------------------------------------------------------------------------------------------------------------------------------|------------------------|-------|--------------------|-------|---|------|
| Hylek & Singer, <sup>19</sup><br>1994c<br>(N=484)                  | R, O | Cerebrovascular disease defined as carotid/vertebro-basilar disease, or history of stroke (n=183) | Intracranial hemorrhage documented by computed tomography, lumbar puncture, or postmortem examination <sup>k</sup>                                                                                                                                                                                                                                                                                                   | 121 <sup>c</sup> (0.6) | NR    | AOR, 2.3 (1.4-3.7) | <.001 | ↑ | Fair |
| Landefeld & Goldman, <sup>20</sup><br>1989<br>(N=375) <sup>l</sup> | R, O | Current or past stroke (n=4)                                                                      | Bleeding in outpatients that (1) was fatal, (2) was life-threatening (led to cardiopulmonary arrest, surgical or angiographic intervention to stop the blood loss, or irreversible damage, such as MI, stroke, blindness, or fibrothorax), (3) was potentially life-threatening (led to 2 of 3 consequences: severe blood loss, hypotension (SBP <90 mm Hg), and critical anemia with a hematocrit ≤0.2), (4) led to | NR (NR)                | <0.01 | AHR, 1.69 (NR)     | <.01  | ↑ | Fair |

severe blood loss (≥3 units of blood), (5) led to surgical treatment, or (6) led to moderate blood loss that was acute or subacute, and was not explained by trauma or surgery

**Minor bleeding event**

|                                                                 |      |                                                   |                                                                                                                          |         |     |                      |     |   |      |
|-----------------------------------------------------------------|------|---------------------------------------------------|--------------------------------------------------------------------------------------------------------------------------|---------|-----|----------------------|-----|---|------|
| Abdelhafiz & Wheeldon, <sup>15</sup> 2008a (N=199) <sup>d</sup> | P, O | History of ischemic cerebrovascular stroke (n=60) | Bleeding not requiring hospital admission, emergency procedure, blood transfusion, or with no other medical consequences | 47 (NR) | .60 | AOR, 2.2 (0.86-5.6)  | .10 | ↔ | Fair |
| Abdelhafiz & Wheeldon, <sup>15</sup> 2008b (N=203) <sup>e</sup> | P, O | History of ischemic cerebrovascular stroke (n=38) | Bleeding not requiring hospital admission, emergency procedure, blood transfusion, or with no other medical consequences | 42 (NR) | .90 | AOR, 0.54 (0.17-1.7) | .30 | ↔ | Fair |

**Any Bleeding**

---

|                                              |      |                       |                                                                                                                                                                                                                                                                                                                                                                                                                                                    |          |      |    |    |    |      |
|----------------------------------------------|------|-----------------------|----------------------------------------------------------------------------------------------------------------------------------------------------------------------------------------------------------------------------------------------------------------------------------------------------------------------------------------------------------------------------------------------------------------------------------------------------|----------|------|----|----|----|------|
| Poli et al, <sup>33</sup><br>2009<br>(N=783) | P, O | Stroke/TIA<br>(n=229) | Combination of<br>major and minor<br>bleeding events<br>where a major<br>bleeding event<br>was defined as<br>fatal, intracranial<br>(documented by<br>imaging), ocular<br>causing<br>blindness,<br>articular, or<br>retroperitoneal;<br>when surgery or<br>transfusion >2<br>blood units were<br>required or when<br>Hgb was $\geq 2$ g/dL;<br>a minor bleeding<br>event was defined<br>as all cases of<br>bleeding not<br>categorized as<br>major | 94 (3.7) | .007 | NA | NA | NA | Fair |
|----------------------------------------------|------|-----------------------|----------------------------------------------------------------------------------------------------------------------------------------------------------------------------------------------------------------------------------------------------------------------------------------------------------------------------------------------------------------------------------------------------------------------------------------------------|----------|------|----|----|----|------|

---

|                                                                 |      |                                                   |                                                                                                                                                                                                                                                                        |         |     |                      |     |   |      |
|-----------------------------------------------------------------|------|---------------------------------------------------|------------------------------------------------------------------------------------------------------------------------------------------------------------------------------------------------------------------------------------------------------------------------|---------|-----|----------------------|-----|---|------|
| Abdelhafiz & Wheeldon, <sup>15</sup> 2008a (N=199) <sup>d</sup> | P, O | History of ischemic cerebrovascular stroke (n=60) | Combination of major and minor bleeding events where a major bleeding event was defined as bleeding requiring hospital admission, emergency procedure, and/or blood transfusion; a minor bleeding event was defined as all other bleeding with no medical consequences | 53 (NR) | .80 | AOR, 2.1 (0.84-5.1)  | .10 | ↔ | Fair |
| Abdelhafiz & Wheeldon, <sup>15</sup> 2008b (N=203) <sup>e</sup> | P, O | History of ischemic cerebrovascular stroke (n=38) | Combination of major and minor bleeding events where a major bleeding event was defined as bleeding requiring hospital admission, emergency procedure, and/or blood transfusion; a minor bleeding event was defined as all other bleeding with no medical consequences | 47 (NR) | .70 | AOR, 0.71 (0.24-1.9) | .50 | ↔ | Fair |

|                                                   |      |                      |                                                                                                                       |                           |    |                         |      |   |      |
|---------------------------------------------------|------|----------------------|-----------------------------------------------------------------------------------------------------------------------|---------------------------|----|-------------------------|------|---|------|
| Berlowitz et al, <sup>27</sup> 2006<br>(N=66,988) | R, O | Stroke<br>(n=12,556) | The presence of a hemorrhagic event was based on the presence of specific <i>ICD-9-CM</i> codes indicative of a bleed | 10,249 <sup>f</sup> (7.7) | NR | AHR 1.12<br>(1.07-1.17) | <.05 | ↑ | Fair |
| Gitter et al, <sup>30</sup> 1995<br>(N=261)       | R, O | TIA<br>(n=40)        | Classified as major or minor bleeding event based on bleeding severity index determined independently by 2 physicians | 27 (12.2)                 | NS | NR                      | NS   | ↔ | Poor |
| Gitter et al, <sup>30</sup> 1995<br>(N=261)       | R, O | Stroke<br>(n=49)     | Classified as major or minor bleeding event based on bleeding severity index determined independently by 2 physicians | 27 (12.2)                 | NS | NR                      | NS   | ↔ | Poor |

<sup>a</sup> AOR = adjusted odds ratio; CI = confidence interval; GI = gastrointestinal; Hgb = hemoglobin; AHR = adjusted hazard ratio; *ICD-9-CM* = *International Classification of Diseases, Ninth Revision, Clinical Modification*; ICH = intracranial hemorrhage; NA = not available; NR = not reported; NS = not significant; O = observational study; AOR = odds ratio; P = prospective; PTY = patient-years; R = retrospective; RBC = red blood cell; SBP = systolic blood pressure; TIA = transient ischemic attack; VA = Veteran Affairs; “X”R = effect size.

<sup>b</sup> ↑=statistically significant increased effect; ↓=statistically significant decreased effect; ↔=no statistically significant effect.

<sup>c</sup> Quality rated as good, fair, or poor based on study design (prospective vs retrospective), likelihood of type 2 error (underpowered analysis due to insufficient patient-years of follow-up, small number of events, or too homogeneous a population), reliability of bleeding definition (use of a well-defined and accepted definition).

<sup>d</sup> All patients in the group aged ≥75 y.

<sup>e</sup>All patients in the group aged <75 y.

<sup>f</sup>Number of bleeding events reported.

<sup>g</sup>Only 145 cases and 870 corresponding controls evaluated in multivariate analysis because of missing data.

<sup>h</sup>Multivariate regression based on 50 cases of ICH and 200 controls because of incomplete data; 31 cases of intracerebral hemorrhage and 122 controls because of incomplete data.

<sup>i</sup>Calculated using a denominator of 565 because outcomes data were lacking for some patients.

<sup>j</sup>Results from both the literature and data-based models are reported; history of GI bleeding result taken from the data-based model.

<sup>k</sup>For all except 1 patient.

<sup>l</sup>Derivation cohort drawn from 565 patients beginning long-term outpatient warfarin therapy.



**TABLE S7. Evidence Depicting the Association Between CHADS<sub>2</sub> Score and Warfarin-Associated Bleeding Risk**

| Reference                              | Study design | Covariate                                 | Bleeding definition                                                                                                                                                                                                                                                                                                                                                                         | No. of cases/ events (rate/100 PTY) | Univariate <i>P</i> value | Multivariate “X”R (95% CI) | Multivariate <i>P</i> value | Effect (↑ ↔ ↓) <sup>b</sup> | Quality <sup>c</sup> |
|----------------------------------------|--------------|-------------------------------------------|---------------------------------------------------------------------------------------------------------------------------------------------------------------------------------------------------------------------------------------------------------------------------------------------------------------------------------------------------------------------------------------------|-------------------------------------|---------------------------|----------------------------|-----------------------------|-----------------------------|----------------------|
| <i>Any Bleeding</i>                    |              |                                           |                                                                                                                                                                                                                                                                                                                                                                                             |                                     |                           |                            |                             |                             |                      |
| Poli et al, <sup>33</sup> 2009 (N=783) | P, O         | Linear CHADS <sub>2</sub> score per point | Combination of major and minor bleeding events where a major bleeding event was defined as fatal, intracranial (documented by imaging), ocular causing blindness, articular, or retroperitoneal; when surgery or transfusion >2 blood units (>900 mL) were required or when Hgb was ≥2 g/dL (≥20 g/L); a minor bleeding event was defined as all cases of bleeding not categorized as major | 94 (3.7)                            | 0.03                      | NA                         | NA                          | NA                          | Fair                 |

<sup>a</sup> CHADS<sub>2</sub> = chronic heart failure, hypertension, advanced age, diabetes, and prior stroke/transient ischemic attack; CI = confidence interval; Hgb = hemoglobin; NA = not available; O = observational study; P = prospective; PTY = patient-years; “X”R = effect size.

<sup>b</sup> ↑ = statistically significant increased effect; ↓ = statistically significant decreased effect; ↔ = no statistically significant effect.

<sup>c</sup> Quality rated as good, fair, or poor based on study design (prospective vs retrospective), likelihood of type 2 error (underpowered analysis due to insufficient PTY of follow-up, small number of events, or too homogeneous a population), reliability of bleeding definition (use of a well-defined and accepted definition).
